# Supplementary material for: Global-, Regional-, and National-Level Impacts of the COVID-19 Pandemic on Tuberculosis Diagnoses, 2020–2021
Source: MDPI journal article supplement (doi:10.3390/microorganisms11092191), 2023-08-30
Supplement: s1 [file s1]

Supplementary Appendix to “Global-, regional-, and national-level impacts of the COVID-19 pandemic on tuberculosis diagnoses, 2020-2021”

## Table of Contents

|                                                                                                                                                                                                                                                       |          |
|-------------------------------------------------------------------------------------------------------------------------------------------------------------------------------------------------------------------------------------------------------|----------|
| <b>Supplemental figures</b>                                                                                                                                                                                                                           | <b>2</b> |
| Figure S1. Geographies within each super-region from the Global Burden of Diseases, Injuries, and Risk Factors (GBD) Study                                                                                                                            | 2        |
| Figure S2. Temporal trends in observed and expected tuberculosis notification rates by Global Burden of Disease super-regions, 2013-2021                                                                                                              | 3        |
| Figure S3. Temporal trends in observed and expected tuberculosis notification rates for the top 20 high tuberculosis burden countries in the Global Burden of Disease 2019 study, 2013-2021                                                           | 4        |
| Figure S4. Bivariate associations [unstandardized coefficients] between tuberculosis risk factors, health system, socio-demographic, public health and social measures, and COVID-19 factors on observed to expected ratios of tuberculosis diagnoses | 5        |
| <b>Supplemental tables</b>                                                                                                                                                                                                                            | <b>6</b> |
| Table S1. Difference in observed to expected tuberculosis diagnoses during the COVID-19 pandemic for 170 countries in 2020 and 2021                                                                                                                   | 6        |
| Table S2. Difference in observed to expected tuberculosis diagnoses during the COVID-19 pandemic for 65 $\geq$ years age group and under 65 age group in 2020 and 2021 for 155 countries                                                              | 10       |
| Table S3. Bivariate linear regression results for observed to expected ratios of tuberculosis diagnoses during the COVID-19 pandemic in 2020                                                                                                          | 20       |
| Table S4. Bivariate linear regression results for observed to expected ratios of tuberculosis diagnoses during the COVID-19 pandemic in 2021                                                                                                          | 22       |

**Figure S1.** Geographies within each super-region from the Global Burden of Diseases, Injuries, and Risk Factors (GBD) Study

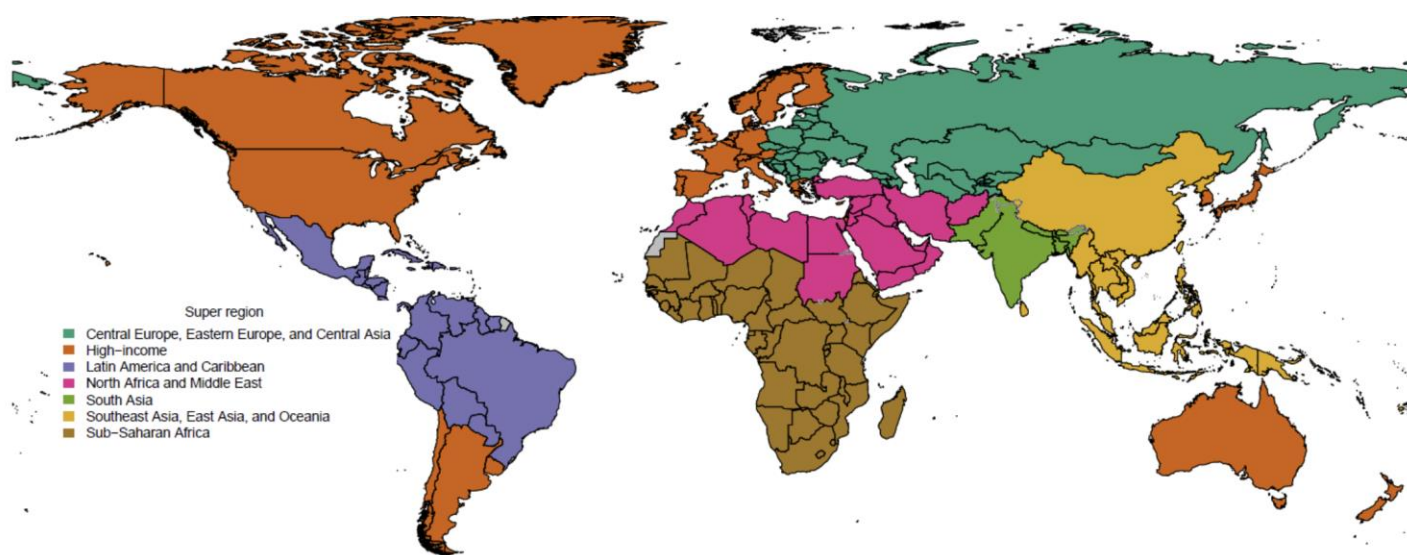

**Figure S2.** Temporal trends in observed and expected tuberculosis notification rates by Global Burden of Disease super-regions, 2013-2021

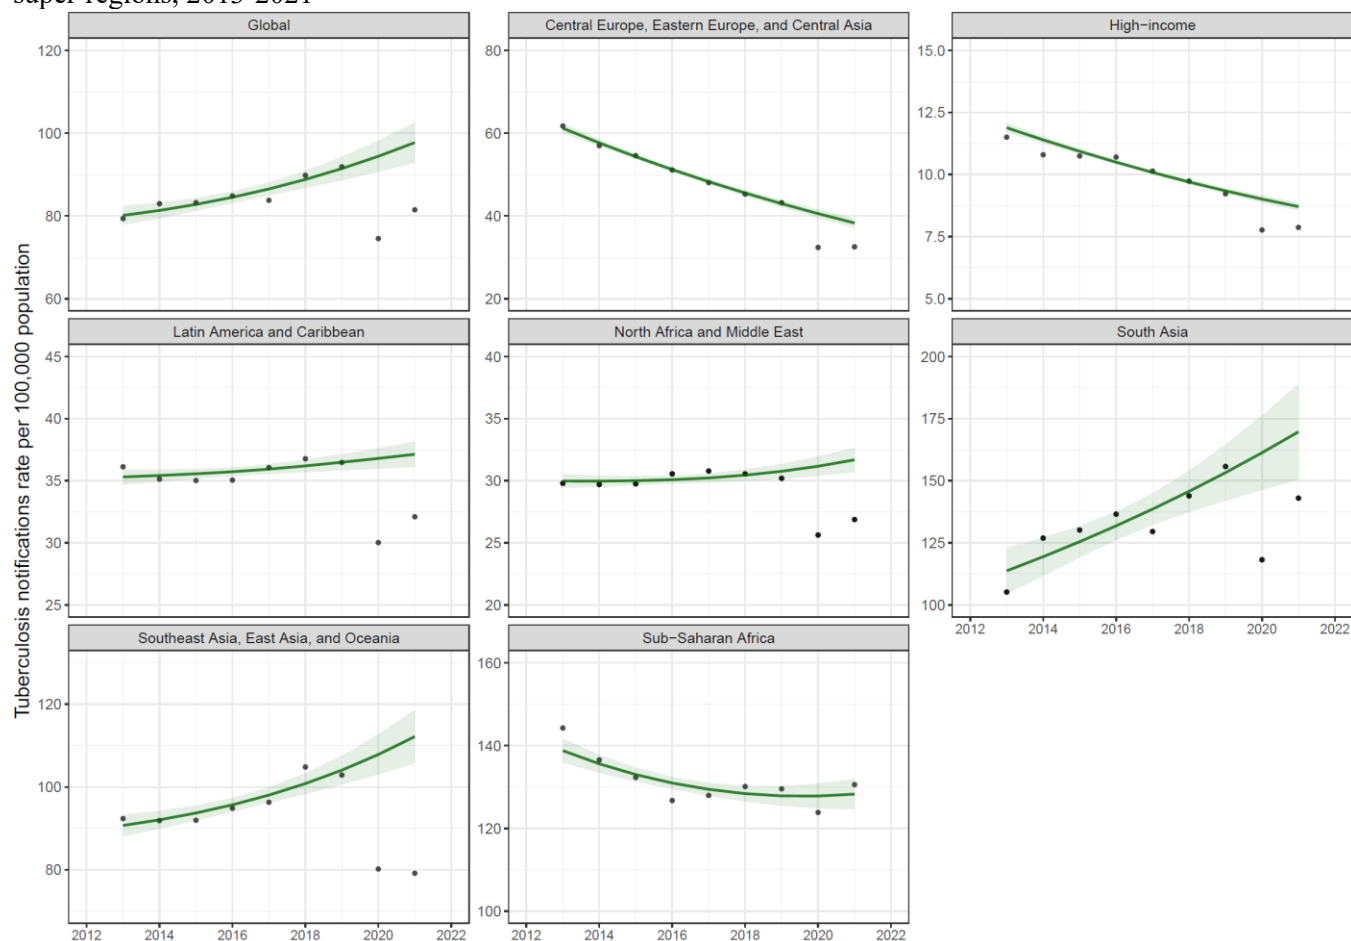

Note: The dark green represents the expected tuberculosis notification rate. The black points are the observed tuberculosis notification rate.

**Figure S3.** Temporal trends in observed and expected tuberculosis notification rates for the top 20 high tuberculosis burden countries in the Global Burden of Disease 2019 study, 2013-2021

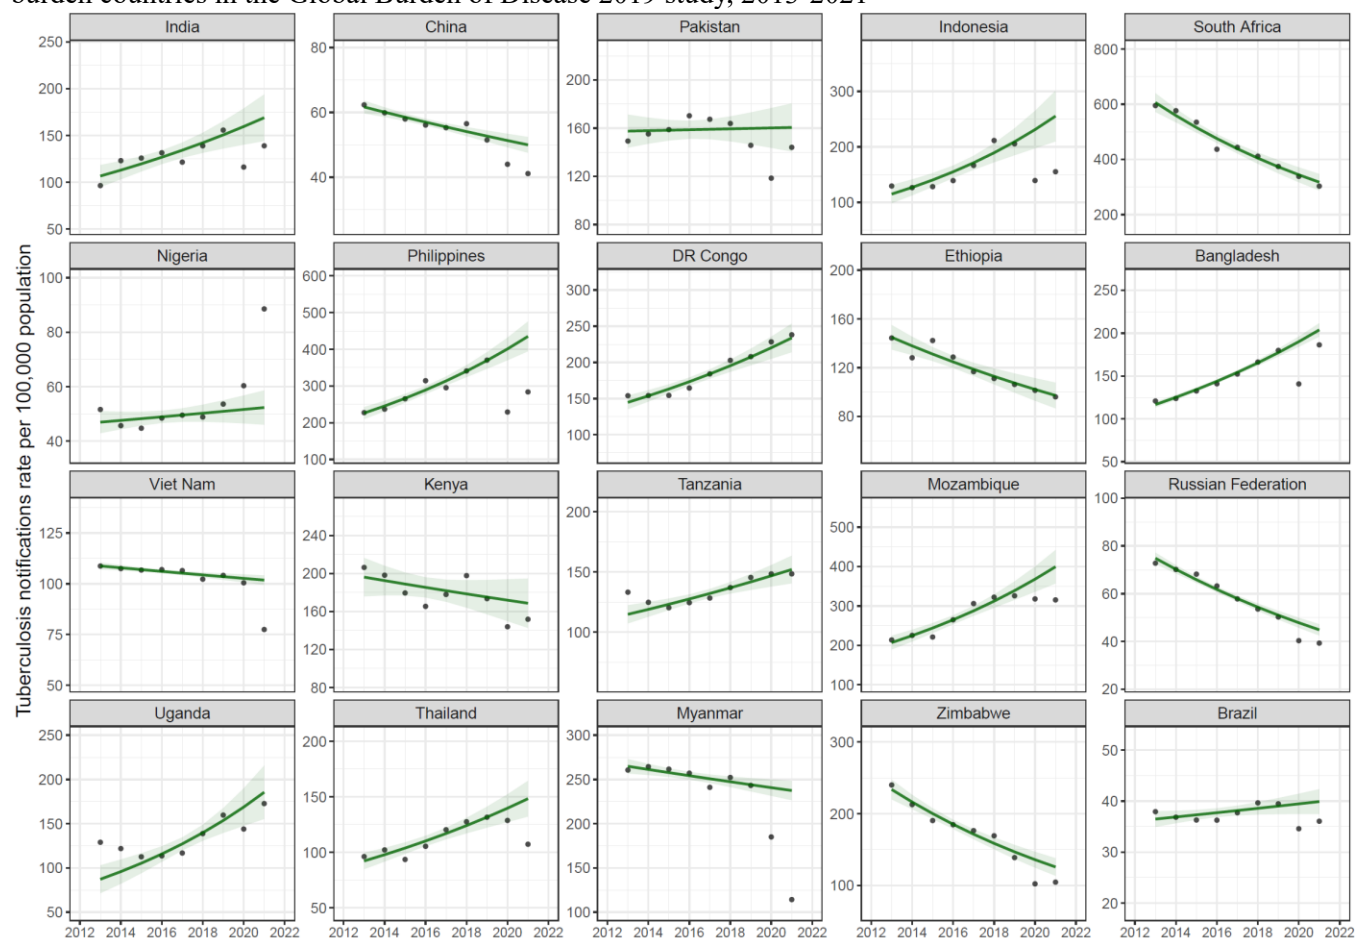

Note: These 20 countries were estimated to rank in the top 20 in terms of all-form incidence counts in 2019 based on GBD 2019 estimates. The dark green represents the expected tuberculosis notification rate. The black points are the observed tuberculosis notification rate.

**Figure S4.** Bivariate associations [unstandardized coefficients] between tuberculosis risk factors, health system, socio-demographic, public health and social measures, and COVID-19 factors on observed to expected ratios of tuberculosis diagnoses

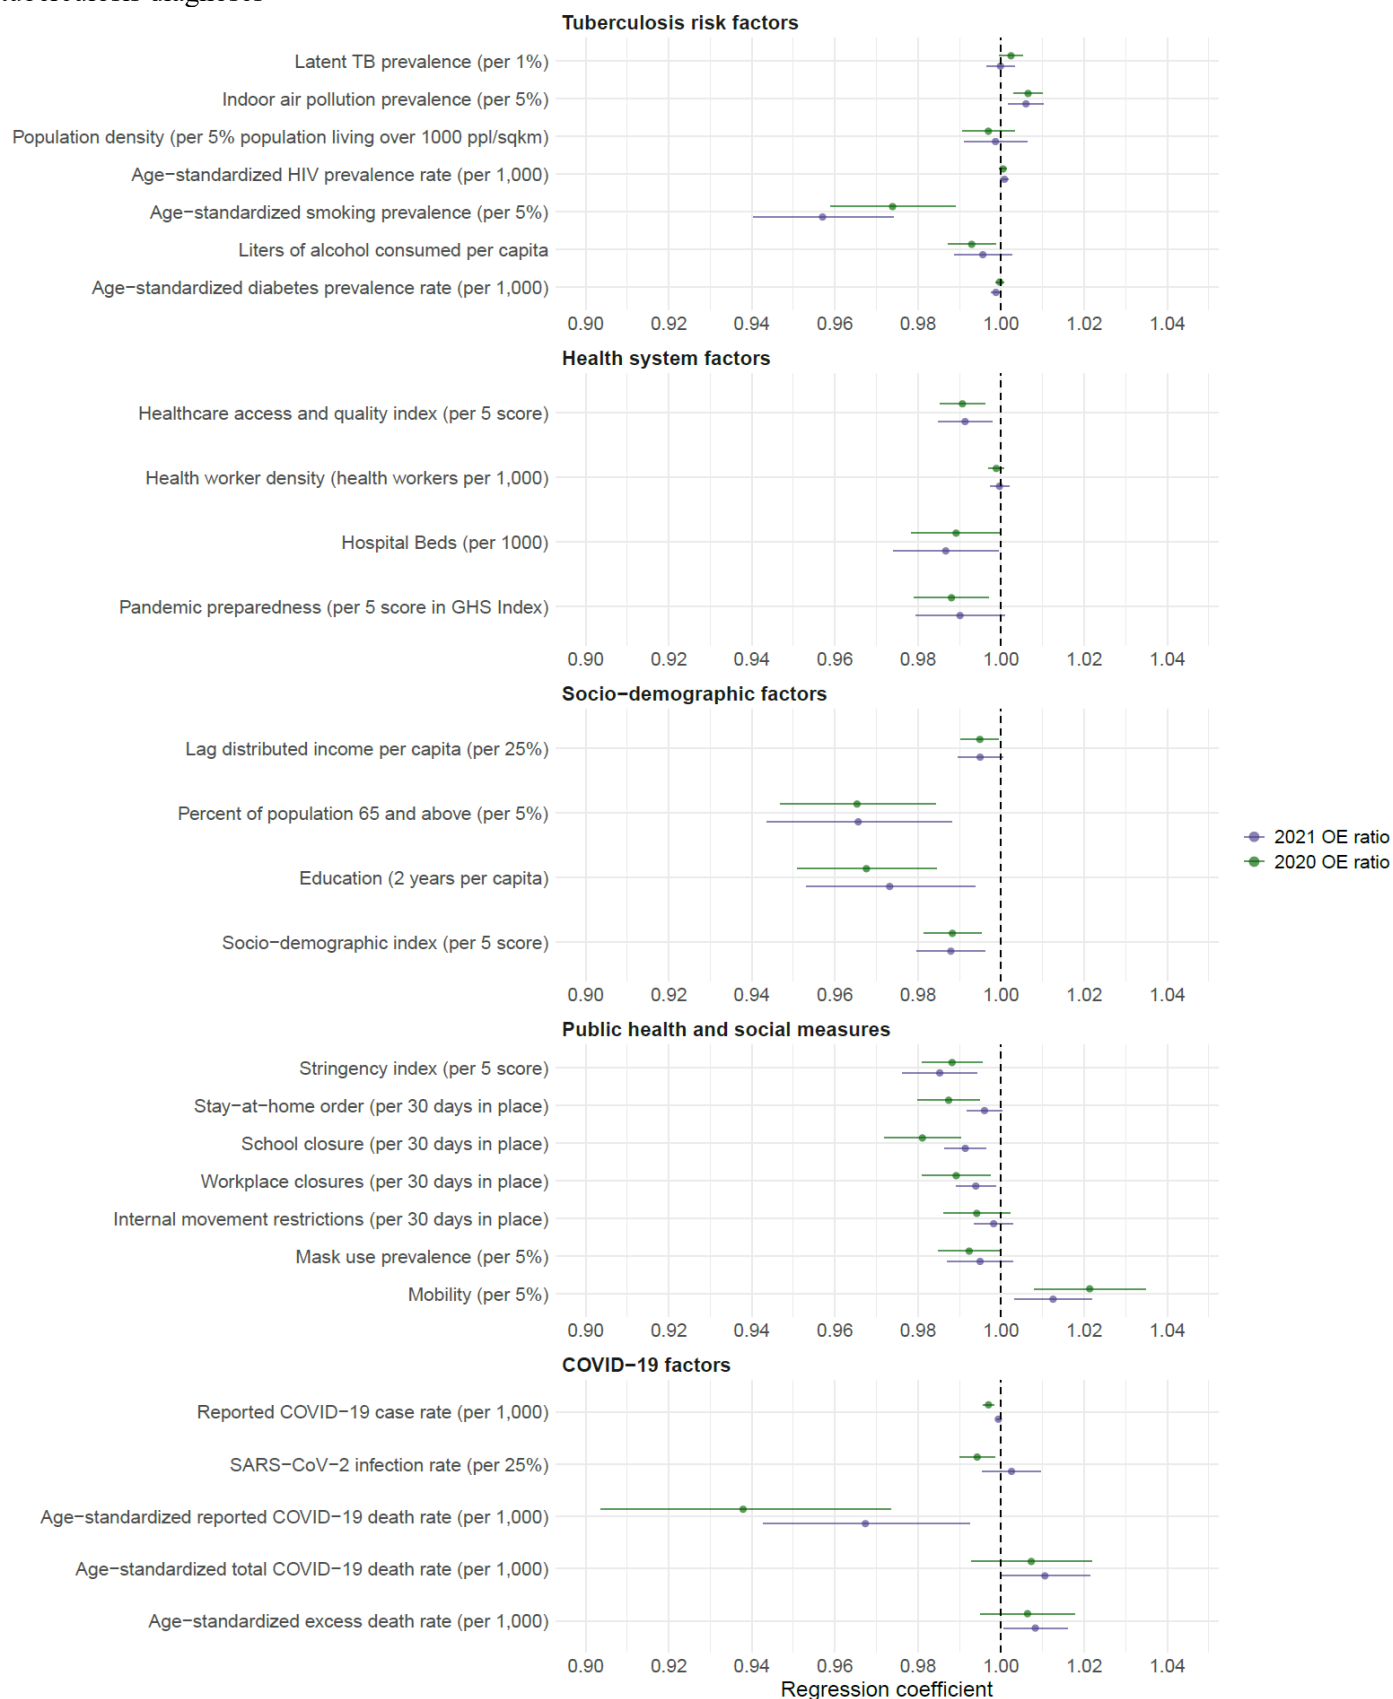

**Table S1.** Difference in observed to expected tuberculosis diagnoses during the COVID-19 pandemic for 170 countries in 2020 and 2021.

| Location                               | Year | Observed TB notifications |       | Expected TB notifications  |                      | Difference in observed to expected TB notifications |                   |
|----------------------------------------|------|---------------------------|-------|----------------------------|----------------------|-----------------------------------------------------|-------------------|
|                                        |      | Cases                     | Rate  | Cases                      | Rate                 | Number                                              | Ratio             |
| Global                                 | 2020 | 5830000                   | 74.5  | 7380000 (7090000, 7680000) | 94.4 (90.6, 98.2)    | -1550000 (-1850000, -1260000)                       | 0.79 (0.75, 0.83) |
|                                        | 2021 | 6430000                   | 81.5  | 7710000 (7330000, 8100000) | 97.7 (92.8, 102.6)   | -1280000 (-1670000, -897000)                        | 0.83 (0.79, 0.88) |
| Southeast Asia, East Asia, and Oceania | 2020 | 1740000                   | 80.2  | 2350000 (2240000, 2450000) | 107.8 (103, 112.7)   | -601000 (-706000, -496000)                          | 0.74 (0.70, 0.78) |
|                                        | 2021 | 1730000                   | 79.2  | 2450000 (2310000, 2590000) | 112.2 (105.7, 118.6) | -721000 (-863000, -580000)                          | 0.71 (0.66, 0.75) |
| East Asia                              | 2020 | 714000                    | 48.6  | 824000 (792000, 856000)    | 56.1 (53.9, 58.3)    | -110000 (-142000, -77100)                           | 0.87 (0.83, 0.9)  |
|                                        | 2021 | 673000                    | 45.7  | 805000 (767000, 843000)    | 54.7 (52.1, 57.3)    | -132000 (-171000, -94200)                           | 0.84 (0.79, 0.88) |
| China                                  | 2020 | 625000                    | 44    | 729000 (699000, 758000)    | 51.3 (49.2, 53.4)    | -104000 (-133000, -74300)                           | 0.86 (0.82, 0.9)  |
|                                        | 2021 | 585000                    | 41.1  | 711000 (677000, 746000)    | 50 (47.6, 52.4)      | -126000 (-161000, -91300)                           | 0.82 (0.78, 0.87) |
| Democratic People's Republic of Korea  | 2020 | 89600                     | 340.3 | 95400 (82000, 109000)      | 362.1 (311.2, 413.1) | -5750 (-19200, 7670)                                | 0.94 (0.8, 1.08)  |
|                                        | 2021 | 87400                     | 331.2 | 93800 (77900, 110000)      | 355.3 (295.2, 415.3) | -6350 (-22200, 9510)                                | 0.93 (0.77, 1.1)  |
| Southeast Asia                         | 2020 | 1000000                   | 144.6 | 1490000 (1390000, 1590000) | 215.2 (200.8, 229.7) | -489000 (-589000, -389000)                          | 0.67 (0.62, 0.73) |
|                                        | 2021 | 1030000                   | 147   | 1610000 (1480000, 1750000) | 230.9 (211.4, 250.3) | -586000 (-721000, -450000)                          | 0.64 (0.57, 0.7)  |
| Cambodia                               | 2020 | 29000                     | 172.6 | 27600 (23800, 31400)       | 163.9 (141.3, 186.4) | 1470 (-2340, 5280)                                  | 1.05 (0.91, 1.19) |
|                                        | 2021 | 21600                     | 126.7 | 26000 (21800, 30300)       | 152.8 (127.6, 178)   | -4450 (-8750, -156)                                 | 0.83 (0.68, 0.98) |
| Indonesia                              | 2020 | 384000                    | 139.2 | 637000 (544000, 730000)    | 231 (197.2, 264.7)   | -253000 (-346000, -160000)                          | 0.60 (0.49, 0.72) |
|                                        | 2021 | 433000                    | 155.1 | 712000 (585000, 839000)    | 255.2 (209.7, 300.8) | -279000 (-406000, -152000)                          | 0.61 (0.47, 0.75) |
| Lao People's Democratic Republic       | 2020 | 8010                      | 110.1 | 7530 (7070, 8000)          | 103.5 (97.1, 109.9)  | 478 (-17.7, 974)                                    | 1.06 (1.00, 1.13) |
|                                        | 2021 | 6170                      | 83.6  | 8260 (7640, 8870)          | 111.9 (103.5, 120.3) | -2080 (-2720, -1450)                                | 0.75 (0.68, 0.82) |
| Malaysia                               | 2020 | 23000                     | 72.8  | 26100 (25300, 26800)       | 82.7 (80.4, 85.1)    | -3120 (-3930, -2310)                                | 0.88 (0.85, 0.91) |
|                                        | 2021 | 21200                     | 66.6  | 26400 (25500, 27400)       | 83.1 (80.2, 86)      | -5250 (-6210, -4290)                                | 0.80 (0.77, 0.83) |
| Maldives                               | 2020 | 107                       | 21.3  | 159 (127, 191)             | 31.7 (25.3, 38)      | -52.2 (-89.8, -14.5)                                | 0.67 (0.45, 0.9)  |
|                                        | 2021 | 87                        | 16.8  | 163 (124, 203)             | 31.6 (24, 39.2)      | -76.2 (-120, -32.9)                                 | 0.53 (0.30, 0.77) |
| Myanmar                                | 2020 | 103000                    | 185   | 135000 (129000, 140000)    | 240.7 (231.5, 249.9) | -31100 (-36300, -25900)                             | 0.77 (0.73, 0.80) |
|                                        | 2021 | 64400                     | 114.2 | 134000 (128000, 140000)    | 237.4 (226.5, 248.4) | -69600 (-75700, -63400)                             | 0.48 (0.45, 0.51) |
| Philippines                            | 2020 | 257000                    | 229.2 | 449000 (414000, 483000)    | 400.9 (370.2, 431.7) | -192000 (-227000, -158000)                          | 0.57 (0.51, 0.63) |
|                                        | 2021 | 322000                    | 283.9 | 493000 (447000, 539000)    | 435.1 (394.5, 475.7) | -171000 (-217000, -125000)                          | 0.65 (0.58, 0.73) |
| Sri Lanka                              | 2020 | 7040                      | 31.8  | 8020 (7680, 8360)          | 36.2 (34.7, 37.7)    | -981 (-1360, -603)                                  | 0.88 (0.83, 0.92) |
|                                        | 2021 | 6550                      | 29.4  | 7820 (7420, 8220)          | 35.1 (33.3, 36.9)    | -1270 (-1700, -838)                                 | 0.84 (0.79, 0.89) |
| Thailand                               | 2020 | 85800                     | 128.6 | 93200 (84800, 102000)      | 139.7 (127.1, 152.2) | -7360 (-15700, 1010)                                | 0.92 (0.83, 1.01) |
|                                        | 2021 | 71500                     | 107.2 | 98800 (88100, 110000)      | 148.2 (132.1, 164.3) | -27400 (-38100, -16600)                             | 0.72 (0.63, 0.82) |
| Timor-Leste                            | 2020 | 3220                      | 235.5 | 3850 (3450, 4240)          | 280.9 (252.1, 309.8) | -622 (-1030, -211)                                  | 0.84 (0.74, 0.94) |
|                                        | 2021 | 3190                      | 228.4 | 3890 (3410, 4370)          | 278.5 (244, 313)     | -699 (-1190, -205)                                  | 0.82 (0.70, 0.94) |
| Viet Nam                               | 2020 | 99900                     | 100.5 | 102000 (1e+05, 104000)     | 102.6 (100.7, 104.6) | -2160 (-4220, -105)                                 | 0.98 (0.96, 1.00) |
|                                        | 2021 | 77700                     | 77.4  | 102000 (99700, 104000)     | 101.8 (99.4, 104.2)  | -24400 (-26800, -22000)                             | 0.76 (0.74, 0.78) |
| Oceania                                | 2020 | 29700                     | 218.2 | 32500 (30200, 34900)       | 239.1 (221.6, 256.5) | -2850 (-5250, -449)                                 | 0.91 (0.84, 0.98) |
|                                        | 2021 | 30200                     | 216.6 | 33700 (30700, 36600)       | 241.6 (220.3, 263)   | -3480 (-6470, -487)                                 | 0.90 (0.81, 0.98) |

|                                                        |      |        |       |                         |                      |                         |                   |
|--------------------------------------------------------|------|--------|-------|-------------------------|----------------------|-------------------------|-------------------|
| Fiji                                                   | 2020 | 431    | 46.8  | 464 (366, 563)          | 50.4 (39.7, 61.1)    | -33.4 (-140, 73.4)      | 0.93 (0.70, 1.15) |
|                                                        | 2021 | 342    | 37    | 495 (367, 623)          | 53.6 (39.7, 67.4)    | -153 (-286, -20.4)      | 0.69 (0.46, 0.92) |
| Kiribati                                               | 2020 | 385    | 321.7 | 383 (277, 488)          | 319.8 (231.7, 407.9) | 2.29 (-110, 115)        | 1.01 (0.71, 1.30) |
|                                                        | 2021 | 330    | 272.4 | 374 (250, 497)          | 308.4 (206.3, 410.4) | -43.6 (-172, 85.1)      | 0.88 (0.56, 1.21) |
| Marshall Islands                                       | 2020 | 147    | 262   | 249 (209, 290)          | 444.4 (372.6, 516.3) | -102 (-149, -55.6)      | 0.59 (0.41, 0.77) |
|                                                        | 2021 | 118    | 209.7 | 272 (219, 325)          | 483.8 (389.6, 578)   | -154 (-211, -97.1)      | 0.43 (0.26, 0.61) |
| Micronesia<br>(Federated States<br>of)                 | 2020 | 92     | 89.6  | 83.7 (48.8, 119)        | 81.5 (47.5, 115.4)   | 8.3 (-31.3, 47.9)       | 1.1 (0.61, 1.59)  |
|                                                        | 2021 | 72     | 70.2  | 74.6 (36.6, 113)        | 72.7 (35.7, 109.7)   | -2.59 (-44, 38.9)       | 0.97 (0.42, 1.51) |
| Papua New Guinea                                       | 2020 | 28200  | 277.4 | 30900 (28500, 33300)    | 303.6 (280.3, 326.9) | -2660 (-5060, -271)     | 0.91 (0.84, 0.99) |
|                                                        | 2021 | 28900  | 276   | 32000 (29000, 34900)    | 305.7 (277.3, 334)   | -3110 (-6090, -121)     | 0.90 (0.81, 0.99) |
| Solomon Islands                                        | 2020 | 321    | 47.9  | 380 (332, 427)          | 56.6 (49.5, 63.7)    | -58.8 (-118, 0.344)     | 0.85 (0.69, 1.00) |
|                                                        | 2021 | 370    | 54.1  | 380 (323, 438)          | 55.7 (47.3, 64.1)    | -10.5 (-79.2, 58.2)     | 0.97 (0.79, 1.15) |
| Vanuatu                                                | 2020 | 83     | 27.1  | 83.1 (66.5, 99.7)       | 27.1 (21.7, 32.5)    | -0.0912 (-24.5, 24.3)   | 1.00 (0.71, 1.29) |
|                                                        | 2021 | 69     | 22    | 78.2 (59.5, 96.9)       | 25 (19, 31)          | -9.19 (-34, 15.6)       | 0.88 (0.57, 1.20) |
| Central Europe,<br>Eastern Europe, and<br>Central Asia | 2020 | 136000 | 32.4  | 170000 (165000, 174000) | 40.6 (39.5, 41.6)    | -34200 (-38600, -29800) | 0.80 (0.78, 0.82) |
|                                                        | 2021 | 136000 | 32.5  | 160000 (155000, 165000) | 38.3 (37.1, 39.5)    | -24100 (-29000, -19100) | 0.85 (0.82, 0.88) |
| Armenia                                                | 2020 | 41600  | 44    | 50900 (48300, 53500)    | 53.8 (51, 56.6)      | -9260 (-11900, -6600)   | 0.82 (0.77, 0.87) |
|                                                        | 2021 | 42200  | 44.1  | 49000 (46000, 51900)    | 51.1 (48, 54.2)      | -6750 (-9770, -3730)    | 0.86 (0.80, 0.92) |
| Azerbaijan                                             | 2020 | 394    | 13.1  | 565 (515, 616)          | 18.8 (17.1, 20.5)    | -171 (-235, -107)       | 0.70 (0.59, 0.81) |
|                                                        | 2021 | 398    | 13.3  | 492 (439, 544)          | 16.4 (14.7, 18.2)    | -93.7 (-159, -28.3)     | 0.81 (0.68, 0.94) |
| Georgia                                                | 2020 | 3680   | 35.3  | 4650 (4500, 4800)       | 44.6 (43.1, 46)      | -970 (-1160, -779)      | 0.79 (0.75, 0.83) |
|                                                        | 2021 | 3660   | 34.9  | 4480 (4310, 4650)       | 42.7 (41, 44.3)      | -818 (-1030, -608)      | 0.82 (0.77, 0.86) |
| Kazakhstan                                             | 2020 | 1670   | 45.8  | 2060 (1900, 2210)       | 56.5 (52.2, 60.7)    | -387 (-562, -212)       | 0.81 (0.73, 0.89) |
|                                                        | 2021 | 1500   | 41.6  | 1900 (1730, 2070)       | 52.7 (47.9, 57.5)    | -400 (-588, -212)       | 0.79 (0.70, 0.88) |
| Kyrgyzstan                                             | 2020 | 9600   | 51.3  | 10700 (8890, 12500)     | 57.2 (47.5, 66.8)    | -1100 (-2920, 725)      | 0.90 (0.74, 1.06) |
|                                                        | 2021 | 9760   | 51.5  | 10000 (7980, 12000)     | 52.8 (42.1, 63.4)    | -243 (-2280, 1790)      | 0.98 (0.77, 1.18) |
| Mongolia                                               | 2020 | 4240   | 62.7  | 6200 (5700, 6690)       | 91.6 (84.3, 99)      | -1960 (-2470, -1440)    | 0.68 (0.61, 0.76) |
|                                                        | 2021 | 4600   | 67    | 6070 (5490, 6650)       | 88.4 (79.9, 96.9)    | -1470 (-2070, -875)     | 0.76 (0.67, 0.84) |
| Tajikistan                                             | 2020 | 3860   | 117.7 | 4060 (3700, 4420)       | 123.8 (112.9, 134.7) | -201 (-579, 177)        | 0.95 (0.86, 1.04) |
|                                                        | 2021 | 2710   | 81.2  | 3990 (3570, 4410)       | 119.6 (107, 132.3)   | -1280 (-1720, -847)     | 0.68 (0.59, 0.77) |
| Turkmenistan                                           | 2020 | 4150   | 41.7  | 5840 (5610, 6070)       | 58.7 (56.4, 61)      | -1690 (-1950, -1430)    | 0.71 (0.67, 0.75) |
|                                                        | 2021 | 4160   | 40.9  | 5830 (5560, 6110)       | 57.4 (54.7, 60.1)    | -1680 (-1980, -1370)    | 0.71 (0.67, 0.76) |
| Uzbekistan                                             | 2020 | 1920   | 37.5  | 1800 (1470, 2130)       | 35.2 (28.8, 41.7)    | 115 (-225, 455)         | 1.06 (0.87, 1.26) |
|                                                        | 2021 | 1880   | 36.4  | 1700 (1330, 2070)       | 32.9 (25.7, 40.1)    | 181 (-199, 561)         | 1.11 (0.87, 1.34) |
| Central Europe                                         | 2020 | 12100  | 36    | 15000 (13300, 16800)    | 44.6 (39.4, 49.8)    | -2900 (-4650, -1140)    | 0.81 (0.70, 0.91) |
|                                                        | 2021 | 13500  | 39.6  | 14500 (12500, 16500)    | 42.3 (36.4, 48.2)    | -944 (-2970, 1080)      | 0.93 (0.80, 1.07) |
| Albania                                                | 2020 | 13600  | 11.7  | 19900 (19500, 20300)    | 17.2 (16.8, 17.5)    | -6330 (-6770, -5900)    | 0.68 (0.66, 0.70) |
|                                                        | 2021 | 14000  | 12.1  | 18600 (18200, 19100)    | 16.2 (15.8, 16.5)    | -4670 (-5150, -4190)    | 0.75 (0.73, 0.77) |
| Albania                                                | 2020 | 240    | 8.9   | 434 (368, 501)          | 16.1 (13.7, 18.6)    | -194 (-267, -121)       | 0.55 (0.41, 0.70) |
|                                                        | 2021 | 269    | 10.1  | 433 (353, 513)          | 16.2 (13.2, 19.2)    | -164 (-250, -77.9)      | 0.62 (0.45, 0.79) |



|                        |      |       |      |                       |                   |                         |                   |
|------------------------|------|-------|------|-----------------------|-------------------|-------------------------|-------------------|
| Bosnia and Herzegovina | 2020 | 357   | 10.7 | 520 (473, 568)        | 15.5 (14.1, 17)   | -163 (-224, -103)       | 0.69 (0.57, 0.80) |
|                        | 2021 | 362   | 11   | 454 (405, 503)        | 13.7 (12.3, 15.2) | -92 (-154, -30.4)       | 0.80 (0.66, 0.93) |
| Bulgaria               | 2020 | 887   | 12.9 | 1140 (1090, 1200)     | 16.6 (15.8, 17.4) | -254 (-335, -173)       | 0.78 (0.71, 0.85) |
|                        | 2021 | 673   | 9.9  | 1050 (992, 1120)      | 15.5 (14.6, 16.4) | -381 (-460, -301)       | 0.64 (0.56, 0.72) |
| Croatia                | 2020 | 177   | 4.2  | 294 (260, 329)        | 6.9 (6.1, 7.8)    | -117 (-161, -73.9)      | 0.60 (0.46, 0.75) |
|                        | 2021 | 154   | 3.7  | 269 (231, 307)        | 6.4 (5.5, 7.3)    | -115 (-160, -70.2)      | 0.57 (0.41, 0.73) |
| Czechia                | 2020 | 360   | 3.4  | 461 (414, 507)        | 4.3 (3.9, 4.8)    | -101 (-160, -41.4)      | 0.78 (0.65, 0.91) |
|                        | 2021 | 352   | 3.3  | 455 (400, 510)        | 4.3 (3.8, 4.8)    | -103 (-169, -36.9)      | 0.77 (0.63, 0.91) |
| Hungary                | 2020 | 384   | 4    | 481 (424, 539)        | 5 (4.4, 5.6)      | -97.5 (-167, -28.3)     | 0.80 (0.66, 0.94) |
|                        | 2021 | 314   | 3.3  | 433 (371, 495)        | 4.5 (3.9, 5.2)    | -119 (-190, -48.4)      | 0.72 (0.57, 0.88) |
| North Macedonia        | 2020 | 143   | 6.5  | 183 (168, 197)        | 8.4 (7.7, 9)      | -39.7 (-67.1, -12.3)    | 0.78 (0.62, 0.94) |
|                        | 2021 | 143   | 6.6  | 168 (152, 184)        | 7.7 (7, 8.4)      | -25.1 (-53.2, 3.12)     | 0.85 (0.68, 1.02) |
| Poland                 | 2020 | 3150  | 8.2  | 4690 (4520, 4850)     | 12.2 (11.8, 12.6) | -1540 (-1730, -1340)    | 0.67 (0.63, 0.71) |
|                        | 2021 | 3450  | 9    | 4410 (4230, 4590)     | 11.5 (11.1, 12)   | -963 (-1180, -747)      | 0.78 (0.73, 0.83) |
| Romania                | 2020 | 7190  | 37.6 | 10400 (10100, 10700)  | 54.2 (52.7, 55.8) | -3170 (-3510, -2830)    | 0.69 (0.66, 0.72) |
|                        | 2021 | 7590  | 40.1 | 9750 (9420, 10100)    | 51.5 (49.7, 53.3) | -2160 (-2540, -1790)    | 0.78 (0.74, 0.81) |
| Serbia                 | 2020 | 439   | 4.9  | 1040 (961, 1120)      | 11.6 (10.7, 12.5) | -600 (-689, -512)       | 0.42 (0.34, 0.50) |
|                        | 2021 | 445   | 5    | 940 (855, 1020)       | 10.5 (9.6, 11.5)  | -495 (-589, -401)       | 0.47 (0.38, 0.56) |
| Slovakia               | 2020 | 153   | 2.8  | 198 (165, 231)        | 3.6 (3, 4.2)      | -44.9 (-85.6, -4.17)    | 0.77 (0.57, 0.97) |
|                        | 2021 | 134   | 2.5  | 180 (145, 216)        | 3.3 (2.7, 4)      | -46.4 (-88.5, -4.16)    | 0.74 (0.52, 0.97) |
| Slovenia               | 2020 | 75    | 3.6  | 89.7 (83.6, 95.8)     | 4.3 (4, 4.6)      | -14.7 (-32.8, 3.34)     | 0.84 (0.62, 1.05) |
|                        | 2021 | 79    | 3.8  | 83.6 (76.7, 90.4)     | 4 (3.7, 4.4)      | -4.55 (-23.3, 14.2)     | 0.95 (0.72, 1.17) |
| Eastern Europe         | 2020 | 80300 | 38.6 | 99000 (95500, 102000) | 47.6 (45.9, 49.2) | -18600 (-22100, -15200) | 0.81 (0.78, 0.84) |
|                        | 2021 | 79800 | 38.6 | 92400 (88600, 96200)  | 44.7 (42.9, 46.5) | -12600 (-16500, -8790)  | 0.86 (0.82, 0.90) |
| Belarus                | 2020 | 1510  | 16.1 | 1930 (1790, 2070)     | 20.6 (19.1, 22.1) | -419 (-579, -259)       | 0.78 (0.70, 0.86) |
|                        | 2021 | 1480  | 15.9 | 1700 (1560, 1850)     | 18.3 (16.7, 19.9) | -220 (-386, -54.2)      | 0.87 (0.78, 0.96) |
| Estonia                | 2020 | 120   | 9.1  | 125 (117, 132)        | 9.5 (8.9, 10.1)   | -4.57 (-27.4, 18.3)     | 0.96 (0.78, 1.15) |
|                        | 2021 | 107   | 8.2  | 112 (104, 120)        | 8.5 (7.9, 9.2)    | -4.96 (-26.9, 17)       | 0.96 (0.76, 1.16) |
| Latvia                 | 2020 |       |      | 401 (354, 449)        | 21.2 (18.7, 23.7) |                         |                   |
|                        | 2021 | 255   | 13.6 | 359 (309, 410)        | 19.2 (16.5, 21.9) | -104 (-164, -45)        | 0.71 (0.55, 0.87) |
| Lithuania              | 2020 | 688   | 24.9 | 963 (894, 1030)       | 34.9 (32.4, 37.4) | -275 (-361, -189)       | 0.71 (0.63, 0.80) |
|                        | 2021 | 628   | 23   | 893 (817, 970)        | 32.7 (30, 35.5)   | -265 (-356, -175)       | 0.70 (0.61, 0.80) |
| Republic of Moldova    | 2020 | 1770  | 48.8 | 2610 (2480, 2740)     | 72.1 (68.6, 75.7) | -847 (-1000, -694)      | 0.68 (0.62, 0.73) |
|                        | 2021 | 2070  | 57.5 | 2420 (2280, 2560)     | 67.4 (63.4, 71.4) | -354 (-523, -185)       | 0.85 (0.79, 0.92) |
| Russian Federation     | 2020 | 58700 | 40.3 | 69600 (66600, 72700)  | 47.8 (45.7, 49.9) | -10900 (-14000, -7810)  | 0.84 (0.80, 0.88) |
|                        | 2021 | 56900 | 39.3 | 65000 (61600, 68400)  | 44.9 (42.5, 47.2) | -8080 (-11500, -4630)   | 0.88 (0.83, 0.93) |
| Ukraine                | 2020 | 17500 | 40.3 | 23300 (21800, 24800)  | 53.5 (50.1, 56.9) | -5750 (-7240, -4250)    | 0.75 (0.70, 0.81) |
|                        | 2021 | 18300 | 42.5 | 21900 (20300, 23600)  | 50.9 (47, 54.7)   | -3610 (-5290, -1930)    | 0.84 (0.76, 0.91) |
| High-income            | 2020 | 84600 | 7.8  | 98200 (96600, 99700)  | 9 (8.9, 9.2)      | -13600 (-15200, -11900) | 0.86 (0.85, 0.88) |
|                        | 2021 | 85900 | 7.9  | 95100 (93200, 96900)  | 8.7 (8.5, 8.9)    | -9140 (-11000, -7230)   | 0.90 (0.88, 0.92) |
|                        | 2020 | 38500 | 20.7 | 43300 (42200, 44400)  | 23.3 (22.7, 23.9) | -4820 (-5980, -3650)    | 0.89 (0.86, 0.91) |

|                          |      |       |      |                      |                   |                       |                   |
|--------------------------|------|-------|------|----------------------|-------------------|-----------------------|-------------------|
| High-income Asia Pacific | 2021 | 35600 | 19.2 | 40700 (39500, 42000) | 22 (21.3, 22.6)   | -5090 (-6370, -3810)  | 0.87 (0.85, 0.9)  |
| Brunei Darussalam        | 2020 | 314   | 70.3 | 261 (239, 283)       | 58.5 (53.6, 63.4) | 52.8 (11.7, 93.9)     | 1.20 (1.05, 1.35) |
|                          | 2021 | 235   | 52.1 | 270 (243, 298)       | 59.9 (53.8, 66)   | -35.1 (-75.9, 5.59)   | 0.87 (0.72, 1.02) |
| Japan                    | 2020 | 12700 | 9.9  | 13900 (13600, 14200) | 10.8 (10.6, 11.1) | -1150 (-1540, -769)   | 0.92 (0.89, 0.94) |
|                          | 2021 | 11500 | 9    | 13100 (12800, 13500) | 10.3 (10, 10.5)   | -1590 (-2000, -1180)  | 0.88 (0.85, 0.91) |
| Republic of Korea        | 2020 | 23100 | 44.7 | 26900 (25900, 27900) | 52 (50.1, 54)     | -3810 (-4880, -2740)  | 0.86 (0.82, 0.90) |
|                          | 2021 | 21400 | 41.6 | 25100 (23900, 26200) | 48.7 (46.4, 50.9) | -3660 (-4840, -2480)  | 0.85 (0.81, 0.90) |
| Singapore                | 2020 | 2360  | 41.4 | 2270 (2050, 2480)    | 39.8 (35.9, 43.6) | 91.9 (-147, 331)      | 1.04 (0.93, 1.15) |
|                          | 2021 | 2460  | 43   | 2270 (2000, 2530)    | 39.6 (35, 44.2)   | 193 (-89, 474)        | 1.08 (0.96, 1.21) |
| Australasia              | 2020 | 1930  | 6.3  | 1860 (1790, 1940)    | 6.1 (5.9, 6.4)    | 66.9 (-47.3, 181)     | 1.04 (0.97, 1.1)  |
|                          | 2021 | 1770  | 5.7  | 1910 (1820, 2000)    | 6.2 (5.9, 6.5)    | -141 (-266, -16.8)    | 0.93 (0.86, 0.99) |
| Australia                | 2020 | 1610  | 6.4  | 1540 (1470, 1620)    | 6.1 (5.8, 6.4)    | 67.9 (-39.9, 176)     | 1.04 (0.97, 1.11) |
|                          | 2021 | 1470  | 5.7  | 1590 (1500, 1680)    | 6.2 (5.8, 6.5)    | -122 (-241, -3.2)     | 0.92 (0.85, 1.00) |
| New Zealand              | 2020 | 316   | 6.2  | 317 (304, 330)       | 6.2 (6, 6.5)      | -1.09 (-38.3, 36.1)   | 1.00 (0.88, 1.11) |
|                          | 2021 | 302   | 5.8  | 321 (305, 337)       | 6.2 (5.9, 6.5)    | -19.4 (-57, 18.2)     | 0.94 (0.82, 1.06) |
| Western Europe           | 2020 | 22800 | 5.2  | 27000 (26100, 28000) | 6.2 (6, 6.4)      | -4190 (-5180, -3210)  | 0.84 (0.81, 0.88) |
|                          | 2021 | 23500 | 5.4  | 26000 (24900, 27100) | 5.9 (5.7, 6.2)    | -2480 (-3650, -1320)  | 0.90 (0.86, 0.95) |
| Austria                  | 2020 | 382   | 4.3  | 460 (400, 520)       | 5.1 (4.5, 5.8)    | -78.1 (-149, -7.13)   | 0.83 (0.68, 0.98) |
|                          | 2021 | 387   | 4.3  | 439 (371, 507)       | 4.9 (4.1, 5.6)    | -52.1 (-131, 26.4)    | 0.88 (0.71, 1.05) |
| Belgium                  | 2020 | 778   | 6.8  | 917 (858, 976)       | 8 (7.5, 8.5)      | -139 (-219, -58.9)    | 0.85 (0.76, 0.94) |
|                          | 2021 | 817   | 7.1  | 915 (845, 986)       | 8 (7.4, 8.6)      | -98.2 (-188, -8.22)   | 0.89 (0.80, 0.99) |
| Denmark                  | 2020 | 207   | 3.6  | 244 (220, 269)       | 4.2 (3.8, 4.6)    | -37.4 (-74.7, -0.192) | 0.85 (0.69, 1.00) |
|                          | 2021 | 191   | 3.3  | 235 (207, 262)       | 4 (3.5, 4.5)      | -43.5 (-82.4, -4.57)  | 0.81 (0.65, 0.98) |
| Finland                  | 2020 | 174   | 3.1  | 214 (197, 231)       | 3.9 (3.6, 4.2)    | -39.7 (-70.6, -8.85)  | 0.81 (0.66, 0.97) |
|                          | 2021 | 170   | 3.1  | 207 (187, 227)       | 3.7 (3.4, 4.1)    | -36.9 (-69.1, -4.74)  | 0.82 (0.66, 0.98) |
| France                   | 2020 | 4400  | 6.6  | 4880 (4680, 5070)    | 7.4 (7.1, 7.7)    | -481 (-715, -246)     | 0.90 (0.85, 0.95) |
|                          | 2021 | 4040  | 6.1  | 4920 (4680, 5150)    | 7.4 (7, 7.8)      | -876 (-1140, -608)    | 0.82 (0.77, 0.87) |
| Germany                  | 2020 | 4010  | 4.7  | 4580 (4200, 4970)    | 5.4 (4.9, 5.8)    | -572 (-975, -168)     | 0.88 (0.79, 0.96) |
|                          | 2021 | 3790  | 4.4  | 4350 (3880, 4810)    | 5.1 (4.5, 5.6)    | -556 (-1040, -76.2)   | 0.87 (0.77, 0.98) |
| Greece                   | 2020 | 380   | 3.7  | 397 (361, 432)       | 3.9 (3.5, 4.2)    | -17 (-69.1, 35.2)     | 0.96 (0.83, 1.09) |
|                          | 2021 | 195   | 1.9  | 386 (345, 428)       | 3.8 (3.4, 4.2)    | -191 (-241, -141)     | 0.50 (0.38, 0.63) |
| Ireland                  | 2020 | 229   | 4.7  | 253 (222, 283)       | 5.1 (4.5, 5.8)    | -23.8 (-66.3, 18.6)   | 0.91 (0.74, 1.07) |
|                          | 2021 | 210   | 4.2  | 243 (208, 278)       | 4.9 (4.2, 5.6)    | -32.7 (-77.7, 12.4)   | 0.87 (0.68, 1.05) |
| Israel                   | 2020 | 158   | 1.7  | 217 (166, 268)       | 2.3 (1.8, 2.8)    | -59 (-115, -2.54)     | 0.73 (0.49, 0.97) |
|                          | 2021 | 213   | 2.2  | 204 (147, 261)       | 2.1 (1.5, 2.7)    | 8.9 (-55, 72.8)       | 1.04 (0.73, 1.36) |
| Italy                    | 2020 | 2160  | 3.6  | 3200 (2670, 3730)    | 5.3 (4.4, 6.2)    | -1040 (-1570, -502)   | 0.68 (0.54, 0.82) |
|                          | 2021 | 2380  | 4    | 3040 (2370, 3710)    | 5.1 (4, 6.2)      | -660 (-1340, 17.3)    | 0.78 (0.58, 0.98) |
| Netherlands              | 2020 | 614   | 3.6  | 758 (699, 817)       | 4.4 (4.1, 4.8)    | -144 (-221, -67.9)    | 0.81 (0.71, 0.91) |
|                          | 2021 | 671   | 3.9  | 745 (675, 814)       | 4.3 (3.9, 4.7)    | -73.8 (-160, 12.4)    | 0.90 (0.79, 1.02) |
| Norway                   | 2020 | 144   | 2.7  | 150 (129, 171)       | 2.8 (2.4, 3.2)    | -5.91 (-37.4, 25.6)   | 0.96 (0.75, 1.17) |

|                             |      |        |      |                         |                     |                         |                   |
|-----------------------------|------|--------|------|-------------------------|---------------------|-------------------------|-------------------|
| Portugal                    | 2021 | 140    | 2.6  | 132 (110, 154)          | 2.4 (2, 2.8)        | 8.34 (-23.6, 40.3)      | 1.06 (0.82, 1.31) |
|                             | 2020 | 1400   | 13.2 | 1590 (1440, 1730)       | 14.9 (13.6, 16.2)   | -185 (-344, -24.7)      | 0.88 (0.79, 0.98) |
|                             | 2021 | 1460   | 13.8 | 1500 (1340, 1670)       | 14.2 (12.7, 15.7)   | -41.6 (-220, 136)       | 0.97 (0.86, 1.09) |
| Spain                       | 2020 | 2950   | 6.4  | 4010 (3500, 4530)       | 8.8 (7.6, 9.9)      | -1070 (-1590, -542)     | 0.73 (0.62, 0.85) |
|                             | 2021 | 3370   | 7.4  | 3890 (3290, 4490)       | 8.5 (7.2, 9.9)      | -521 (-1130, 86.3)      | 0.87 (0.72, 1.01) |
| Sweden                      | 2020 | 316    | 3.1  | 463 (326, 601)          | 4.5 (3.2, 5.8)      | -147 (-289, -5.38)      | 0.68 (0.42, 0.94) |
|                             | 2021 | 344    | 3.3  | 435 (281, 590)          | 4.2 (2.7, 5.7)      | -91.3 (-250, 67.7)      | 0.79 (0.46, 1.12) |
| Switzerland                 | 2020 | 351    | 4    | 470 (362, 579)          | 5.3 (4.1, 6.5)      | -119 (-234, -5.02)      | 0.75 (0.53, 0.96) |
|                             | 2021 | 355    | 4    | 466 (337, 595)          | 5.2 (3.8, 6.7)      | -111 (-245, 23.3)       | 0.76 (0.50, 1.02) |
| United Kingdom              | 2020 | 4180   | 6.2  | 4230 (3940, 4510)       | 6.3 (5.8, 6.7)      | -42.3 (-354, 269)       | 0.99 (0.92, 1.06) |
|                             | 2021 | 4800   | 7.1  | 3910 (3600, 4230)       | 5.8 (5.3, 6.2)      | 884 (541, 1230)         | 1.23 (1.13, 1.32) |
|                             | 2020 | 12700  | 18.9 | 15700 (15100, 16200)    | 23.2 (22.4, 24.1)   | -2940 (-3550, -2340)    | 0.81 (0.78, 0.85) |
| Southern Latin America      | 2021 | 15500  | 22.9 | 16200 (15500, 16900)    | 23.9 (22.8, 24.9)   | -660 (-1400, 84.5)      | 0.96 (0.91, 1.00) |
|                             | 2020 | 9320   | 20.6 | 11500 (11000, 12100)    | 25.4 (24.2, 26.6)   | -2190 (-2760, -1620)    | 0.81 (0.76, 0.86) |
| Argentina                   | 2021 | 11900  | 26.2 | 11900 (11200, 12600)    | 26.1 (24.6, 27.6)   | 39.2 (-669, 748)        | 1.00 (0.94, 1.06) |
|                             | 2020 | 2420   | 13   | 3090 (2950, 3230)       | 16.5 (15.8, 17.3)   | -668 (-840, -496)       | 0.78 (0.73, 0.84) |
|                             | 2021 | 2630   | 14   | 3200 (3020, 3380)       | 17 (16.1, 18)       | -566 (-771, -361)       | 0.82 (0.76, 0.88) |
| Uruguay                     | 2020 | 968    | 28.4 | 1050 (987, 1120)        | 30.9 (28.9, 32.8)   | -84.7 (-174, 4.69)      | 0.92 (0.83, 1.00) |
|                             | 2021 | 951    | 27.9 | 1080 (1000, 1170)       | 31.8 (29.4, 34.2)   | -133 (-234, -31.6)      | 0.88 (0.79, 0.97) |
| High-income North America   | 2020 | 8610   | 2.3  | 10300 (10100, 10400)    | 2.8 (2.8, 2.8)      | -1680 (-1910, -1450)    | 0.84 (0.81, 0.86) |
|                             | 2021 | 9460   | 2.6  | 10200 (10000, 10400)    | 2.8 (2.7, 2.8)      | -758 (-1020, -500)      | 0.93 (0.90, 0.95) |
| Canada                      | 2020 | 1760   | 4.8  | 1940 (1850, 2020)       | 5.2 (5, 5.4)        | -174 (-293, -55.7)      | 0.91 (0.85, 0.97) |
|                             | 2021 | 1900   | 5.1  | 1990 (1890, 2100)       | 5.3 (5, 5.6)        | -90.7 (-227, 45.4)      | 0.95 (0.89, 1.02) |
| United States of America    | 2020 | 6850   | 2.1  | 8350 (8240, 8470)       | 2.5 (2.5, 2.6)      | -1500 (-1710, -1300)    | 0.82 (0.79, 0.84) |
|                             | 2021 | 7560   | 2.3  | 8220 (8090, 8360)       | 2.5 (2.4, 2.5)      | -668 (-887, -448)       | 0.92 (0.89, 0.95) |
| Latin America and Caribbean | 2020 | 177000 | 30   | 217000 (212000, 222000) | 36.8 (36, 37.6)     | -40000 (-45000, -35000) | 0.82 (0.80, 0.84) |
|                             | 2021 | 191000 | 32.1 | 221000 (215000, 227000) | 37.1 (36.1, 38.2)   | -29900 (-36000, -23700) | 0.86 (0.84, 0.89) |
| Caribbean                   | 2020 | 15300  | 32.4 | 17800 (17100, 18600)    | 37.8 (36.2, 39.4)   | -2550 (-3330, -1770)    | 0.86 (0.82, 0.90) |
|                             | 2021 | 15100  | 31.8 | 17100 (16200, 18000)    | 36 (34.2, 37.8)     | -2010 (-2890, -1120)    | 0.88 (0.83, 0.93) |
| Belize                      | 2020 | 78     | 18.5 | 99.6 (62.7, 136)        | 23.7 (14.9, 32.4)   | -21.6 (-62.3, 19.1)     | 0.78 (0.40, 1.17) |
|                             | 2021 | 72     | 16.8 | 99.3 (55, 144)          | 23.1 (12.8, 33.4)   | -27.3 (-74.5, 20)       | 0.73 (0.30, 1.15) |
| Cuba                        | 2020 | 580    | 5.1  | 648 (608, 689)          | 5.7 (5.4, 6.1)      | -68.2 (-130, -6.01)     | 0.89 (0.80, 0.99) |
|                             | 2021 | 509    | 4.5  | 633 (585, 681)          | 5.6 (5.2, 6)        | -124 (-189, -59.1)      | 0.80 (0.70, 0.91) |
| Dominican Republic          | 2020 | 2620   | 24   | 3540 (3320, 3760)       | 32.5 (30.5, 34.5)   | -921 (-1160, -679)      | 0.74 (0.68, 0.80) |
|                             | 2021 | 3370   | 30.6 | 3410 (3150, 3660)       | 30.9 (28.6, 33.2)   | -32.4 (-311, 246)       | 0.99 (0.91, 1.07) |
| Guyana                      | 2020 | 366    | 47.6 | 477 (427, 527)          | 62.1 (55.6, 68.6)   | -111 (-174, -49)        | 0.77 (0.64, 0.89) |
|                             | 2021 | 414    | 54.1 | 454 (397, 511)          | 59.4 (51.9, 66.8)   | -40.1 (-110, 29.4)      | 0.91 (0.76, 1.06) |
| Haiti                       | 2020 | 11300  | 89.2 | 12600 (11900, 13300)    | 100.1 (94.5, 105.6) | -1370 (-2100, -632)     | 0.89 (0.84, 0.95) |
|                             | 2021 | 10400  | 80.9 | 12100 (11300, 12900)    | 93.8 (87.6, 100.1)  | -1660 (-2490, -833)     | 0.86 (0.80, 0.93) |
| Jamaica                     | 2020 | 61     | 2.2  | 87.7 (61.9, 114)        | 3.1 (2.2, 4.1)      | -26.7 (-56.7, 3.31)     | 0.70 (0.37, 1.02) |
|                             | 2021 | 57     | 2    | 85.9 (55.5, 116)        | 3.1 (2, 4.2)        | -28.9 (-62.7, 4.93)     | 0.66 (0.31, 1.02) |

|                                    |      |        |      |                         |                   |                         |                   |
|------------------------------------|------|--------|------|-------------------------|-------------------|-------------------------|-------------------|
| Suriname                           | 2020 | 103    | 17.8 | 142 (109, 176)          | 24.7 (18.8, 30.5) | -39.4 (-78.7, -0.149)   | 0.72 (0.46, 0.98) |
|                                    | 2021 | 88     | 15.2 | 143 (102, 184)          | 24.6 (17.6, 31.7) | -54.8 (-99.6, -9.95)    | 0.62 (0.34, 0.89) |
| Trinidad and Tobago                | 2020 | 220    | 15.8 | 213 (171, 255)          | 15.3 (12.3, 18.3) | 7.05 (-43.7, 57.8)      | 1.03 (0.79, 1.27) |
|                                    | 2021 | 171    | 12.3 | 209 (160, 258)          | 15 (11.5, 18.5)   | -38.1 (-93.5, 17.2)     | 0.82 (0.57, 1.07) |
| Andean Latin America               | 2020 | 35000  | 53.7 | 45500 (44500, 46500)    | 69.8 (68.3, 71.4) | -10500 (-11600, -9410)  | 0.77 (0.75, 0.79) |
|                                    | 2021 | 38300  | 57.9 | 45800 (44500, 47000)    | 69.2 (67.4, 71.1) | -7450 (-8740, -6170)    | 0.84 (0.81, 0.86) |
| Bolivia (Plurinational State of)   | 2020 | 6010   | 51.4 | 7240 (7070, 7400)       | 62 (60.5, 63.4)   | -1230 (-1450, -1010)    | 0.83 (0.80, 0.86) |
|                                    | 2021 | 7070   | 59.9 | 7080 (6880, 7270)       | 60 (58.3, 61.6)   | -5.56 (-261, 250)       | 1.00 (0.96, 1.04) |
| Ecuador                            | 2020 | 5270   | 29.5 | 6420 (6010, 6820)       | 36 (33.7, 38.3)   | -1150 (-1580, -715)     | 0.82 (0.76, 0.88) |
|                                    | 2021 | 5600   | 31   | 6620 (6110, 7130)       | 36.6 (33.8, 39.5) | -1020 (-1550, -493)     | 0.85 (0.77, 0.92) |
| Peru                               | 2020 | 23800  | 66.6 | 31900 (31000, 32800)    | 89.3 (86.8, 91.8) | -8110 (-9060, -7150)    | 0.75 (0.72, 0.77) |
|                                    | 2021 | 25700  | 70.7 | 32100 (31000, 33200)    | 88.4 (85.4, 91.5) | -6420 (-7570, -5280)    | 0.80 (0.77, 0.83) |
| Central Latin America              | 2020 | 48800  | 19.4 | 64600 (62800, 66500)    | 25.7 (24.9, 26.4) | -15800 (-17700, -13900) | 0.76 (0.73, 0.78) |
|                                    | 2021 | 55100  | 21.8 | 66800 (64400, 69300)    | 26.4 (25.4, 27.4) | -11700 (-14200, -9210)  | 0.82 (0.79, 0.86) |
| Colombia                           | 2020 | 12100  | 24.8 | 14600 (14100, 15100)    | 29.9 (28.9, 31)   | -2520 (-3060, -1970)    | 0.83 (0.79, 0.86) |
|                                    | 2021 | 13700  | 27.8 | 15100 (14400, 15700)    | 30.7 (29.4, 32)   | -1400 (-2060, -730)     | 0.91 (0.86, 0.95) |
| Costa Rica                         | 2020 | 342    | 7.2  | 380 (333, 427)          | 8 (7, 9)          | -38 (-97.6, 21.6)       | 0.90 (0.74, 1.06) |
|                                    | 2021 | 350    | 7.4  | 372 (317, 428)          | 7.8 (6.7, 9)      | -22.5 (-89.2, 44.2)     | 0.94 (0.76, 1.12) |
| El Salvador                        | 2020 | 2040   | 31.8 | 3930 (3080, 4790)       | 61.2 (47.9, 74.5) | -1890 (-2750, -1030)    | 0.52 (0.36, 0.68) |
|                                    | 2021 | 1940   | 30   | 4260 (3130, 5390)       | 66 (48.5, 83.5)   | -2320 (-3450, -1190)    | 0.45 (0.27, 0.64) |
| Guatemala                          | 2020 | 2750   | 17.6 | 3690 (3490, 3900)       | 23.7 (22.3, 25)   | -944 (-1180, -713)      | 0.74 (0.69, 0.80) |
|                                    | 2021 | 3090   | 19.6 | 3760 (3510, 4020)       | 23.9 (22.3, 25.5) | -675 (-952, -398)       | 0.82 (0.75, 0.89) |
| Honduras                           | 2020 | 1850   | 18.6 | 2560 (2350, 2780)       | 25.8 (23.6, 27.9) | -715 (-945, -485)       | 0.72 (0.64, 0.80) |
|                                    | 2021 | 2060   | 20.4 | 2500 (2250, 2750)       | 24.7 (22.2, 27.2) | -435 (-702, -169)       | 0.83 (0.73, 0.93) |
| Mexico                             | 2020 | 17600  | 13.7 | 24200 (24100, 24300)    | 18.8 (18.7, 18.9) | -6590 (-6870, -6310)    | 0.73 (0.71, 0.74) |
|                                    | 2021 | 21700  | 16.7 | 24600 (24500, 24700)    | 19 (19, 19.1)     | -2970 (-3280, -2660)    | 0.88 (0.87, 0.89) |
| Nicaragua                          | 2020 | 1890   | 28.6 | 2020 (1900, 2150)       | 30.7 (28.8, 32.6) | -139 (-291, 13.9)       | 0.93 (0.86, 1.01) |
|                                    | 2021 | 1840   | 27.5 | 1940 (1790, 2080)       | 29 (26.9, 31.2)   | -101 (-269, 66.7)       | 0.95 (0.86, 1.03) |
| Panama                             | 2020 | 1130   | 26.8 | 1640 (1230, 2060)       | 38.8 (29, 48.6)   | -509 (-929, -88.5)      | 0.69 (0.47, 0.91) |
|                                    | 2021 | 1450   | 33.8 | 1640 (1140, 2140)       | 38.2 (26.6, 49.8) | -188 (-693, 317)        | 0.89 (0.59, 1.18) |
| Venezuela (Bolivarian Republic of) | 2020 | 9150   | 33.9 | 11600 (10100, 13100)    | 43 (37.4, 48.5)   | -2460 (-3970, -955)     | 0.79 (0.67, 0.90) |
|                                    | 2021 | 9090   | 34.1 | 12700 (10700, 14700)    | 47.7 (40.2, 55.2) | -3610 (-5610, -1600)    | 0.72 (0.58, 0.85) |
| Tropical Latin America             | 2020 | 78000  | 34.5 | 89100 (84800, 93500)    | 39.5 (37.6, 41.4) | -11200 (-15500, -6760)  | 0.87 (0.83, 0.92) |
|                                    | 2021 | 82200  | 36.1 | 90900 (85500, 96200)    | 39.9 (37.6, 42.3) | -8710 (-14100, -3330)   | 0.90 (0.85, 0.96) |
| Brazil                             | 2020 | 75600  | 34.6 | 86300 (81900, 90600)    | 39.5 (37.5, 41.4) | -10700 (-15000, -6270)  | 0.88 (0.83, 0.92) |
|                                    | 2021 | 79400  | 36   | 87900 (82600, 93300)    | 39.9 (37.5, 42.3) | -8480 (-13900, -3100)   | 0.90 (0.85, 0.96) |
| Paraguay                           | 2020 | 2360   | 33.3 | 2860 (2750, 2970)       | 40.4 (38.8, 41.9) | -499 (-644, -355)       | 0.83 (0.78, 0.88) |
|                                    | 2021 | 2730   | 38.1 | 2970 (2830, 3100)       | 41.4 (39.5, 43.3) | -231 (-402, -60.8)      | 0.92 (0.86, 0.98) |
| North Africa and Middle East       | 2020 | 158000 | 25.6 | 192000 (187000, 197000) | 31.2 (30.4, 32)   | -34100 (-39000, -29100) | 0.82 (0.80, 0.85) |
|                                    | 2021 | 167000 | 26.9 | 197000 (191000, 204000) | 31.7 (30.7, 32.7) | -29900 (-36200, -23600) | 0.85 (0.82, 0.88) |

|                            |      |         |       |                            |                      |                             |                   |
|----------------------------|------|---------|-------|----------------------------|----------------------|-----------------------------|-------------------|
| Algeria                    | 2020 | 17200   | 39.5  | 22600 (20500, 24800)       | 51.9 (47, 56.8)      | -5400 (-7560, -3240)        | 0.76 (0.68, 0.85) |
|                            | 2021 | 19000   | 43    | 22600 (20000, 25100)       | 51.1 (45.2, 56.9)    | -3560 (-6150, -964)         | 0.84 (0.74, 0.95) |
| Bahrain                    | 2020 | 193     | 12.7  | 147 (113, 181)             | 9.7 (7.5, 12)        | 46.1 (2.53, 89.7)           | 1.31 (1.00, 1.63) |
|                            | 2021 | 196     | 12.8  | 140 (101, 180)             | 9.2 (6.6, 11.8)      | 55.5 (7.38, 104)            | 1.40 (1.02, 1.77) |
| Egypt                      | 2020 | 6980    | 6.7   | 8270 (7760, 8770)          | 7.9 (7.5, 8.4)       | -1280 (-1810, -756)         | 0.84 (0.78, 0.90) |
|                            | 2021 | 6760    | 6.4   | 8330 (7720, 8940)          | 7.9 (7.3, 8.5)       | -1570 (-2200, -939)         | 0.81 (0.74, 0.88) |
| Iran (Islamic Republic of) | 2020 | 5990    | 7.1   | 8020 (7680, 8370)          | 9.4 (9, 9.8)         | -2030 (-2410, -1650)        | 0.75 (0.70, 0.79) |
|                            | 2021 | 6200    | 7.3   | 7640 (7240, 8030)          | 8.9 (8.5, 9.4)       | -1440 (-1860, -1010)        | 0.81 (0.76, 0.86) |
| Iraq                       | 2020 | 4990    | 12.3  | 6430 (6060, 6800)          | 15.8 (14.9, 16.8)    | -1440 (-1840, -1050)        | 0.78 (0.72, 0.83) |
|                            | 2021 | 5800    | 14.1  | 6140 (5720, 6570)          | 14.9 (13.9, 15.9)    | -341 (-790, 107)            | 0.94 (0.87, 1.02) |
| Jordan                     | 2020 | 250     | 2.1   | 473 (385, 560)             | 4 (3.2, 4.7)         | -223 (-316, -130)           | 0.53 (0.37, 0.69) |
|                            | 2021 | 219     | 1.8   | 483 (374, 591)             | 3.9 (3, 4.8)         | -264 (-376, -152)           | 0.45 (0.28, 0.63) |
| Kuwait                     | 2020 | 691     | 15.3  | 891 (742, 1040)            | 19.7 (16.4, 23)      | -200 (-357, -42.7)          | 0.78 (0.62, 0.94) |
|                            | 2021 | 736     | 15.8  | 908 (725, 1090)            | 19.5 (15.6, 23.5)    | -172 (-363, 18.1)           | 0.81 (0.62, 1.00) |
| Lebanon                    | 2020 | 658     | 11.9  | 645 (531, 759)             | 11.6 (9.6, 13.7)     | 12.8 (-112, 137)            | 1.02 (0.83, 1.21) |
|                            | 2021 | 471     | 8.5   | 631 (496, 765)             | 11.4 (9, 13.8)       | -160 (-301, -18.8)          | 0.75 (0.55, 0.95) |
| Libya                      | 2020 | 1750    | 25.6  | 2150 (1470, 2830)          | 31.4 (21.5, 41.4)    | -401 (-1090, 283)           | 0.81 (0.53, 1.10) |
|                            | 2021 | 1940    | 28.3  | 2390 (1470, 3310)          | 34.7 (21.3, 48.1)    | -443 (-1370, 482)           | 0.81 (0.46, 1.16) |
| Morocco                    | 2020 | 29000   | 78.5  | 31500 (30500, 32500)       | 85.2 (82.5, 87.9)    | -2460 (-3520, -1410)        | 0.92 (0.89, 0.95) |
|                            | 2021 | 29300   | 78.9  | 31600 (30400, 32800)       | 85.1 (81.8, 88.4)    | -2310 (-3570, -1050)        | 0.93 (0.89, 0.97) |
| Oman                       | 2020 | 313     | 6.9   | 296 (220, 372)             | 6.5 (4.9, 8.2)       | 17.4 (-66.1, 101)           | 1.06 (0.77, 1.35) |
|                            | 2021 | 231     | 4.9   | 288 (199, 377)             | 6.1 (4.2, 8)         | -56.8 (-150, 37)            | 0.80 (0.50, 1.1)  |
| Qatar                      | 2020 | 861     | 29.7  | 931 (803, 1060)            | 32.1 (27.7, 36.5)    | -69.6 (-210, 70.4)          | 0.93 (0.78, 1.07) |
|                            | 2021 | 983     | 33    | 1050 (867, 1230)           | 35.2 (29.1, 41.2)    | -63.8 (-254, 127)           | 0.94 (0.76, 1.12) |
| Saudi Arabia               | 2020 | 2450    | 6.6   | 2730 (2520, 2930)          | 7.4 (6.8, 7.9)       | -278 (-503, -51.9)          | 0.90 (0.82, 0.98) |
|                            | 2021 | 2580    | 6.8   | 2630 (2390, 2860)          | 7 (6.3, 7.6)         | -51.4 (-307, 205)           | 0.98 (0.88, 1.08) |
| Syrian Arab Republic       | 2020 | 2640    | 18.9  | 2900 (2310, 3480)          | 20.7 (16.5, 24.9)    | -257 (-853, 338)            | 0.91 (0.71, 1.11) |
|                            | 2021 | 3290    | 23.4  | 3020 (2280, 3750)          | 21.5 (16.3, 26.7)    | 274 (-468, 1020)            | 1.09 (0.83, 1.35) |
| Tunisia                    | 2020 | 2680    | 22.7  | 3310 (3050, 3580)          | 28.1 (25.9, 30.4)    | -637 (-920, -353)           | 0.81 (0.73, 0.89) |
|                            | 2021 | 2640    | 22.3  | 3320 (3000, 3650)          | 28.1 (25.4, 30.8)    | -688 (-1020, -352)          | 0.79 (0.70, 0.89) |
| Türkiye                    | 2020 | 8830    | 10.6  | 10800 (10600, 11000)       | 13 (12.8, 13.2)      | -1970 (-2220, -1710)        | 0.82 (0.79, 0.84) |
|                            | 2021 | 9050    | 10.8  | 10400 (10200, 10600)       | 12.4 (12.2, 12.7)    | -1350 (-1630, -1070)        | 0.87 (0.84, 0.90) |
| United Arab Emirates       | 2020 | 62      | 0.6   | 76.9 (58.4, 95.4)          | 0.8 (0.6, 1)         | -14.9 (-39, 9.19)           | 0.81 (0.50, 1.12) |
|                            | 2021 | 66      | 0.7   | 78.4 (55.6, 101)           | 0.8 (0.6, 1.1)       | -12.4 (-40.2, 15.4)         | 0.84 (0.50, 1.19) |
| Yemen                      | 2020 | 8860    | 26.9  | 9750 (8100, 11400)         | 29.6 (24.6, 34.6)    | -886 (-2540, 772)           | 0.91 (0.75, 1.07) |
|                            | 2021 | 9370    | 27.8  | 9770 (7780, 11800)         | 29 (23.1, 35)        | -405 (-2410, 1600)          | 0.96 (0.76, 1.16) |
| South Asia                 | 2020 | 2160000 | 118.2 | 2950000 (2670000, 3220000) | 161.3 (146.3, 176.3) | -787000 (-1060000, -513000) | 0.73 (0.65, 0.81) |
|                            | 2021 | 2640000 | 143   | 3130000 (2780000, 3490000) | 169.7 (150.5, 189)   | -493000 (-849000, -138000)  | 0.84 (0.74, 0.95) |
| Afghanistan                | 2020 | 45800   | 151.6 | 59400 (55800, 62900)       | 196.4 (184.6, 208.2) | -13500 (-17100, -9960)      | 0.77 (0.72, 0.83) |
|                            | 2021 | 50300   | 161.2 | 65500 (60700, 70300)       | 209.9 (194.5, 225.2) | -15200 (-20000, -10400)     | 0.77 (0.70, 0.83) |
| Bangladesh                 | 2020 | 230000  | 140.8 | 311000 (301000, 320000)    | 190 (184, 196)       | -80500 (-90400, -70700)     | 0.74 (0.71, 0.77) |

|                                  |      |         |       |                            |                      |                            |                   |
|----------------------------------|------|---------|-------|----------------------------|----------------------|----------------------------|-------------------|
| Bhutan                           | 2021 | 307000  | 186.3 | 335000 (323000, 348000)    | 203.7 (195.9, 211.6) | -28700 (-41700, -15800)    | 0.91 (0.88, 0.95) |
|                                  | 2020 | 911     | 120.1 | 900 (755, 1050)            | 118.7 (99.5, 137.9)  | 10.7 (-147, 168)           | 1.01 (0.84, 1.19) |
|                                  | 2021 | 854     | 112.8 | 873 (704, 1040)            | 115.4 (93, 137.8)    | -19.5 (-199, 160)          | 0.98 (0.77, 1.18) |
| India                            | 2020 | 1630000 | 116.2 | 2240000 (1970000, 2510000) | 159.5 (140.2, 178.9) | -608000 (-879000, -336000) | 0.73 (0.62, 0.83) |
|                                  | 2021 | 1970000 | 139   | 2390000 (2040000, 2740000) | 168.9 (144.1, 193.8) | -424000 (-776000, -72400)  | 0.82 (0.69, 0.96) |
| Nepal                            | 2020 | 27300   | 88.5  | 30300 (28700, 32000)       | 98.4 (93.1, 103.7)   | -3060 (-4720, -1400)       | 0.90 (0.85, 0.95) |
|                                  | 2021 | 28300   | 90.8  | 29800 (27900, 31700)       | 95.6 (89.5, 101.8)   | -1520 (-3460, 428)         | 0.95 (0.89, 1.01) |
| Pakistan                         | 2020 | 273000  | 118.4 | 369000 (331000, 407000)    | 160.1 (143.6, 176.6) | -96200 (-134000, -58100)   | 0.74 (0.65, 0.83) |
|                                  | 2021 | 339000  | 144   | 378000 (331000, 425000)    | 160.5 (140.5, 180.5) | -38800 (-85900, 8290)      | 0.90 (0.78, 1.02) |
| Sub-Saharan Africa               | 2020 | 1370000 | 123.9 | 1410000 (1380000, 1450000) | 127.8 (124.8, 130.8) | -43900 (-77200, -10600)    | 0.97 (0.95, 0.99) |
|                                  | 2021 | 1480000 | 130.6 | 1450000 (1410000, 1500000) | 128.3 (124.6, 131.9) | 26100 (-15500, 67700)      | 1.02 (0.99, 1.05) |
| Central Sub-Saharan Africa       | 2020 | 294000  | 220.3 | 295000 (278000, 312000)    | 220.6 (208, 233.2)   | -383 (-17300, 16500)       | 1.00 (0.94, 1.06) |
|                                  | 2021 | 308000  | 225.1 | 315000 (293000, 336000)    | 229.8 (213.8, 245.7) | -6380 (-28300, 15500)      | 0.98 (0.91, 1.05) |
| Angola                           | 2020 | 63100   | 199.3 | 70600 (60600, 80500)       | 222.7 (191.2, 254.2) | -7410 (-17400, 2580)       | 0.89 (0.76, 1.03) |
|                                  | 2021 | 61700   | 188.6 | 73000 (60500, 85500)       | 223.3 (185.1, 261.5) | -11300 (-23800, 1170)      | 0.84 (0.69, 1.00) |
| Central African Republic         | 2020 | 12600   | 233.8 | 12200 (10800, 13500)       | 225.9 (200.9, 250.9) | 427 (-939, 1790)           | 1.04 (0.92, 1.15) |
|                                  | 2021 | 13200   | 241   | 12700 (11000, 14400)       | 232.1 (201, 263.2)   | 487 (-1230, 2200)          | 1.04 (0.90, 1.18) |
| Congo                            | 2020 | 11200   | 210.8 | 11100 (10100, 12200)       | 210 (190.1, 230)     | 40.7 (-1040, 1120)         | 1.00 (0.91, 1.10) |
|                                  | 2021 | 12000   | 222.2 | 11300 (9970, 12500)        | 208.7 (184.9, 232.6) | 724 (-581, 2030)           | 1.06 (0.94, 1.18) |
| Democratic Republic of the Congo | 2020 | 201000  | 228.5 | 194000 (180000, 207000)    | 220.3 (205, 235.6)   | 7210 (-6270, 20700)        | 1.04 (0.97, 1.11) |
|                                  | 2021 | 214000  | 238.2 | 211000 (193000, 228000)    | 233.9 (214.1, 253.6) | 3870 (-13900, 21700)       | 1.02 (0.93, 1.10) |
| Equatorial Guinea                | 2020 | 1510    | 102.6 | 1540 (1370, 1710)          | 104.5 (93, 116)      | -27.4 (-213, 158)          | 0.98 (0.86, 1.10) |
|                                  | 2021 | 1880    | 124.2 | 1590 (1370, 1800)          | 105 (90.6, 119.3)    | 290 (57.2, 524)            | 1.18 (1.03, 1.34) |
| Gabon                            | 2020 | 4880    | 272.4 | 5500 (5100, 5900)          | 307.1 (284.8, 329.4) | -622 (-1040, -200)         | 0.89 (0.81, 0.96) |
|                                  | 2021 | 5070    | 279.3 | 5490 (5010, 5970)          | 302.3 (275.9, 328.8) | -418 (-918, 82.5)          | 0.92 (0.84, 1.01) |
| Eastern Sub-Saharan Africa       | 2020 | 562000  | 134.8 | 603000 (582000, 623000)    | 144.6 (139.6, 149.6) | -41000 (-61900, -20100)    | 0.93 (0.90, 0.97) |
|                                  | 2021 | 595000  | 139.6 | 631000 (604000, 658000)    | 148.2 (141.8, 154.5) | -36400 (-63300, -9410)     | 0.94 (0.90, 0.98) |
| Burundi                          | 2020 | 7100    | 55.5  | 7200 (6490, 7900)          | 56.2 (50.7, 61.7)    | -93.8 (-818, 630)          | 0.99 (0.89, 1.09) |
|                                  | 2021 | 6790    | 51.3  | 7180 (6330, 8020)          | 54.3 (47.9, 60.7)    | -390 (-1250, 470)          | 0.95 (0.83, 1.06) |
| Comoros                          | 2020 | 156     | 21.2  | 166 (115, 217)             | 22.6 (15.7, 29.4)    | -9.98 (-66.3, 46.3)        | 0.94 (0.61, 1.27) |
|                                  | 2021 | 134     | 18    | 172 (108, 235)             | 23.1 (14.5, 31.6)    | -37.7 (-105, 29.7)         | 0.78 (0.42, 1.14) |
| Djibouti                         | 2020 | 1700    | 138.5 | 1680 (1440, 1920)          | 136.7 (117.1, 156.3) | 22.4 (-231, 276)           | 1.01 (0.86, 1.17) |
|                                  | 2021 | 1800    | 142.9 | 1540 (1270, 1800)          | 122.1 (101.2, 143.1) | 262 (-14.4, 537)           | 1.17 (0.98, 1.36) |
| Eritrea                          | 2020 | 1590    | 24.7  | 1660 (1460, 1860)          | 25.7 (22.6, 28.8)    | -65.3 (-280, 149)          | 0.96 (0.83, 1.09) |
|                                  | 2021 | 1600    | 24.3  | 1560 (1330, 1780)          | 23.6 (20.2, 27)      | 45.5 (-192, 283)           | 1.03 (0.88, 1.18) |
| Ethiopia                         | 2020 | 108000  | 101.4 | 109000 (99100, 119000)     | 102.1 (92.9, 111.4)  | -801 (-10700, 9090)        | 0.99 (0.90, 1.08) |
|                                  | 2021 | 105000  | 96    | 106000 (94300, 117000)     | 97.1 (86.6, 107.7)   | -1230 (-12800, 10300)      | 0.99 (0.88, 1.10) |
| Kenya                            | 2020 | 71100   | 144   | 84900 (74000, 95700)       | 171.9 (149.9, 193.9) | -13800 (-24700, -2920)     | 0.84 (0.72, 0.95) |
|                                  | 2021 | 76000   | 151.8 | 84500 (71400, 97500)       | 168.7 (142.7, 194.7) | -8440 (-21500, 4590)       | 0.90 (0.75, 1.05) |
| Madagascar                       | 2020 | 36100   | 129.2 | 37600 (35500, 39700)       | 134.5 (127, 142)     | -1460 (-3580, 671)         | 0.96 (0.91, 1.02) |
|                                  | 2021 | 40000   | 140.2 | 39400 (36700, 42100)       | 137.9 (128.6, 147.3) | 637 (-2050, 3330)          | 1.02 (0.95, 1.08) |



|                             |      |        |       |                         |                      |                         |                   |
|-----------------------------|------|--------|-------|-------------------------|----------------------|-------------------------|-------------------|
| Malawi                      | 2020 | 15100  | 79.6  | 15800 (14400, 17200)    | 83.2 (75.8, 90.5)    | -686 (-2100, 733)       | 0.96 (0.87, 1.04) |
|                             | 2021 | 14400  | 74    | 15600 (14000, 17300)    | 80.4 (71.9, 89)      | -1250 (-2930, 427)      | 0.92 (0.82, 1.02) |
| Mauritius                   | 2020 | 101    | 7.9   | 120 (112, 128)          | 9.4 (8.8, 10.1)      | -19 (-40.3, 2.43)       | 0.84 (0.65, 1.03) |
|                             | 2021 | 91     | 7.2   | 119 (109, 129)          | 9.3 (8.6, 10.1)      | -27.7 (-48.8, -6.51)    | 0.77 (0.57, 0.96) |
| Mozambique                  | 2020 | 96200  | 317.6 | 111000 (102000, 121000) | 367.7 (335.7, 399.7) | -15200 (-24900, -5460)  | 0.86 (0.78, 0.94) |
|                             | 2021 | 97900  | 315.1 | 124000 (111000, 137000) | 399.2 (356.8, 441.7) | -26100 (-39300, -12900) | 0.79 (0.69, 0.88) |
| Rwanda                      | 2020 | 5510   | 42.4  | 5770 (5580, 5960)       | 44.4 (42.9, 45.8)    | -259 (-499, -19.5)      | 0.96 (0.91, 1.00) |
|                             | 2021 | 5220   | 39.3  | 5780 (5550, 6010)       | 43.6 (41.8, 45.3)    | -563 (-833, -293)       | 0.90 (0.86, 0.95) |
| Somalia                     | 2020 | 17200  | 82.7  | 18200 (17100, 19300)    | 87.6 (82.3, 93)      | -1030 (-2170, 114)      | 0.94 (0.88, 1.00) |
|                             | 2021 | 17400  | 80.6  | 19200 (17800, 20600)    | 88.8 (82.3, 95.4)    | -1770 (-3210, -327)     | 0.91 (0.84, 0.98) |
| United Republic of Tanzania | 2020 | 84800  | 148.3 | 83900 (78800, 89000)    | 146.7 (137.8, 155.6) | 903 (-4220, 6030)       | 1.01 (0.95, 1.07) |
|                             | 2021 | 86700  | 148.3 | 88800 (82100, 95500)    | 152 (140.5, 163.4)   | -2120 (-8850, 4620)     | 0.98 (0.90, 1.05) |
| Uganda                      | 2020 | 60900  | 143.9 | 71400 (62400, 80400)    | 168.8 (147.6, 190)   | -10500 (-19500, -1530)  | 0.85 (0.74, 0.97) |
|                             | 2021 | 74800  | 172.7 | 80300 (67300, 93400)    | 185.5 (155.3, 215.7) | -5540 (-18600, 7540)    | 0.93 (0.77, 1.09) |
| Zambia                      | 2020 | 40000  | 210.2 | 34300 (32400, 36100)    | 180.1 (170.5, 189.7) | 5740 (3870, 7610)       | 1.17 (1.11, 1.23) |
|                             | 2021 | 50100  | 256.6 | 33400 (31300, 35500)    | 171.1 (160.2, 182.1) | 16700 (14500, 18900)    | 1.50 (1.42, 1.58) |
| Southern Sub-Saharan Africa | 2020 | 223000 | 279.3 | 235000 (219000, 250000) | 294.6 (275.3, 314)   | -12200 (-27700, 3210)   | 0.95 (0.88, 1.01) |
|                             | 2021 | 204000 | 254   | 218000 (201000, 235000) | 271.7 (250.4, 293)   | -14200 (-31400, 2910)   | 0.93 (0.86, 1.01) |
| Botswana                    | 2020 | 2480   | 105.1 | 3480 (2720, 4240)       | 147.2 (115.2, 179.2) | -995 (-1760, -233)      | 0.71 (0.53, 0.90) |
|                             | 2021 | 2350   | 98.2  | 3150 (2340, 3970)       | 131.7 (97.6, 165.9)  | -803 (-1630, 20.1)      | 0.75 (0.52, 0.97) |
| Lesotho                     | 2020 | 4560   | 243.6 | 6300 (5670, 6930)       | 336.2 (302.7, 369.7) | -1730 (-2380, -1090)    | 0.72 (0.64, 0.81) |
|                             | 2021 | 4490   | 239.5 | 5970 (5250, 6680)       | 318.3 (280.3, 356.3) | -1480 (-2200, -751)     | 0.75 (0.65, 0.86) |
| Namibia                     | 2020 | 6510   | 270.6 | 7530 (7060, 8010)       | 313.2 (293.3, 333)   | -1030 (-1530, -522)     | 0.86 (0.80, 0.93) |
|                             | 2021 | 6700   | 275.7 | 7240 (6690, 7790)       | 298 (275.3, 320.6)   | -541 (-1110, 32.1)      | 0.93 (0.85, 1.00) |
| South Africa                | 2020 | 191000 | 338.2 | 194000 (179000, 210000) | 343.9 (316.9, 371)   | -3270 (-18600, 12000)   | 0.98 (0.91, 1.06) |
|                             | 2021 | 172000 | 302.9 | 180000 (163000, 197000) | 317.2 (287.4, 347.1) | -8170 (-25100, 8810)    | 0.95 (0.86, 1.05) |
| Eswatini                    | 2020 | 2140   | 186.4 | 2190 (1840, 2530)       | 190.1 (159.8, 220.4) | -42.6 (-403, 318)       | 0.98 (0.82, 1.14) |
|                             | 2021 | 1930   | 167.4 | 1870 (1520, 2230)       | 162.3 (131.5, 193)   | 59.1 (-306, 425)        | 1.03 (0.83, 1.23) |
| Zimbabwe                    | 2020 | 15700  | 102.3 | 20900 (19200, 22600)    | 135.9 (124.8, 146.9) | -5160 (-6880, -3450)    | 0.75 (0.68, 0.82) |
|                             | 2021 | 16300  | 104.6 | 19600 (17700, 21500)    | 125.7 (113.5, 137.9) | -3300 (-5220, -1370)    | 0.83 (0.74, 0.92) |
| Western Sub-Saharan Africa  | 2020 | 292000 | 61.3  | 282000 (270000, 294000) | 59.2 (56.7, 61.8)    | 9730 (-2460, 21900)     | 1.03 (0.99, 1.08) |
|                             | 2021 | 372000 | 76    | 289000 (274000, 305000) | 59.1 (56, 62.2)      | 83100 (67700, 98400)    | 1.29 (1.23, 1.35) |
| Benin                       | 2020 | 3910   | 29.9  | 4060 (3700, 4420)       | 31 (28.3, 33.8)      | -155 (-536, 227)        | 0.96 (0.87, 1.05) |
|                             | 2021 | 3710   | 27.5  | 4090 (3650, 4530)       | 30.3 (27.1, 33.6)    | -382 (-837, 73.3)       | 0.91 (0.80, 1.01) |
| Burkina Faso                | 2020 | 5690   | 25.7  | 5480 (4880, 6080)       | 24.7 (22, 27.4)      | 212 (-406, 830)         | 1.04 (0.92, 1.15) |
|                             | 2021 | 6880   | 30.2  | 5460 (4740, 6190)       | 24 (20.8, 27.2)      | 1420 (678, 2160)        | 1.26 (1.11, 1.41) |
| Cameroon                    | 2020 | 22100  | 71.6  | 23500 (22500, 24400)    | 76 (72.7, 79.2)      | -1360 (-2390, -325)     | 0.94 (0.90, 0.99) |
|                             | 2021 | 22400  | 70.5  | 23000 (21800, 24200)    | 72.4 (68.7, 76)      | -587 (-1790, 616)       | 0.97 (0.92, 1.03) |
| Cabo Verde                  | 2020 | 207    | 37.2  | 188 (172, 204)          | 33.9 (31, 36.7)      | 18.7 (-13.7, 51.1)      | 1.10 (0.93, 1.27) |
|                             | 2021 | 182    | 32.5  | 176 (158, 194)          | 31.4 (28.2, 34.6)    | 6.29 (-25.6, 38.2)      | 1.04 (0.86, 1.22) |
| Chad                        | 2020 | 12800  | 74.9  | 13400 (12100, 14800)    | 78.5 (70.7, 86.4)    | -629 (-1990, 735)       | 0.95 (0.85, 1.05) |

|                       |      |        |       |                         |                      |                       |                   |
|-----------------------|------|--------|-------|-------------------------|----------------------|-----------------------|-------------------|
| Côte d'Ivoire         | 2021 | 13600  | 76.9  | 13800 (12200, 15500)    | 77.9 (68.5, 87.3)    | -183 (-1870, 1510)    | 0.99 (0.87, 1.11) |
|                       | 2020 | 19700  | 72.4  | 19900 (18800, 20900)    | 72.9 (69.2, 76.6)    | -138 (-1190, 916)     | 0.99 (0.94, 1.05) |
|                       | 2021 | 20700  | 74.4  | 19300 (18100, 20500)    | 69.3 (65, 73.6)      | 1420 (200, 2640)      | 1.07 (1.01, 1.14) |
| Gambia                | 2020 | 2400   | 102.8 | 2550 (2390, 2720)       | 109.2 (102.1, 116.3) | -149 (-341, 43.2)     | 0.94 (0.87, 1.02) |
|                       | 2021 | 2250   | 94.1  | 2570 (2360, 2770)       | 107.2 (98.8, 115.6)  | -312 (-534, -89.8)    | 0.88 (0.80, 0.96) |
| Ghana                 | 2020 | 12700  | 37.9  | 14000 (13300, 14600)    | 41.7 (39.9, 43.5)    | -1280 (-1930, -636)   | 0.91 (0.86, 0.95) |
|                       | 2021 | 13400  | 39.1  | 13800 (13100, 14500)    | 40.3 (38.2, 42.4)    | -402 (-1160, 356)     | 0.97 (0.92, 1.03) |
| Guinea                | 2020 | 15600  | 119.3 | 16600 (15600, 17500)    | 126.7 (119.5, 134)   | -970 (-1950, 6.73)    | 0.94 (0.88, 1.00) |
|                       | 2021 | 18800  | 139.6 | 17600 (16400, 18800)    | 130.9 (121.8, 139.9) | 1180 (-67.7, 2420)    | 1.07 (0.99, 1.14) |
| Guinea-Bissau         | 2020 | 2540   | 126   | 2270 (2050, 2490)       | 112.6 (101.6, 123.6) | 270 (27.2, 513)       | 1.12 (1.01, 1.23) |
|                       | 2021 | 2490   | 120.6 | 2290 (2020, 2560)       | 110.8 (97.7, 123.8)  | 203 (-83.3, 490)      | 1.09 (0.96, 1.22) |
| Liberia               | 2020 | 6960   | 130.6 | 8530 (6530, 10500)      | 160.1 (122.5, 197.7) | -1570 (-3580, 436)    | 0.82 (0.60, 1.03) |
|                       | 2021 | 7330   | 134.2 | 8970 (6420, 11500)      | 164.2 (117.6, 210.9) | -1640 (-4190, 914)    | 0.82 (0.56, 1.07) |
| Mali                  | 2020 | 6920   | 29.8  | 7230 (6660, 7810)       | 31.1 (28.6, 33.6)    | -312 (-909, 284)      | 0.96 (0.88, 1.04) |
|                       | 2021 | 7280   | 30.2  | 7430 (6720, 8140)       | 30.8 (27.9, 33.8)    | -146 (-877, 586)      | 0.98 (0.88, 1.08) |
| Mauritania            | 2020 | 2340   | 54.4  | 2510 (2330, 2680)       | 58.2 (54.2, 62.3)    | -164 (-361, 32.9)     | 0.93 (0.86, 1.01) |
|                       | 2021 | 2440   | 55.5  | 2540 (2330, 2750)       | 57.8 (53, 62.6)      | -102 (-334, 131)      | 0.96 (0.87, 1.05) |
| Niger                 | 2020 | 11400  | 47.2  | 10800 (9780, 11700)     | 44.6 (40.6, 48.7)    | 620 (-376, 1620)      | 1.06 (0.96, 1.15) |
|                       | 2021 | 12800  | 51.1  | 10800 (9590, 11900)     | 43 (38.3, 47.7)      | 2020 (824, 3220)      | 1.19 (1.07, 1.31) |
| Nigeria               | 2020 | 136000 | 60.3  | 116000 (105000, 128000) | 51.6 (46.5, 56.7)    | 19600 (8070, 31200)   | 1.17 (1.06, 1.28) |
|                       | 2021 | 205000 | 88.6  | 121000 (106000, 135000) | 52.3 (46, 58.6)      | 83800 (69200, 98400)  | 1.69 (1.54, 1.85) |
| Sao Tome and Principe | 2020 | 92     | 43.1  | 145 (114, 176)          | 68.1 (53.6, 82.5)    | -53.3 (-89.4, -17.1)  | 0.63 (0.40, 0.87) |
|                       | 2021 | 82     | 37.9  | 142 (106, 179)          | 65.6 (48.9, 82.4)    | -60.2 (-101, -19.8)   | 0.58 (0.32, 0.83) |
| Senegal               | 2020 | 12800  | 82.3  | 13200 (12900, 13500)    | 85 (83.1, 86.9)      | -428 (-797, -59)      | 0.97 (0.94, 1.00) |
|                       | 2021 | 13400  | 84.3  | 13200 (12900, 13600)    | 83.3 (81.1, 85.6)    | 153 (-267, 574)       | 1.01 (0.98, 1.04) |
| Sierra Leone          | 2020 | 15700  | 182.1 | 19300 (17600, 21000)    | 224.3 (204.6, 243.9) | -3640 (-5350, -1920)  | 0.81 (0.73, 0.89) |
|                       | 2021 | 17600  | 197.9 | 20800 (18600, 23000)    | 234.7 (209.7, 259.6) | -3260 (-5490, -1030)  | 0.84 (0.74, 0.94) |
| Togo                  | 2020 | 2330   | 28.4  | 2510 (2340, 2690)       | 30.7 (28.5, 32.8)    | -186 (-386, 13.8)     | 0.93 (0.85, 1.00) |
|                       | 2021 | 2440   | 29.1  | 2490 (2280, 2700)       | 29.8 (27.3, 32.3)    | -54.1 (-285, 177)     | 0.98 (0.89, 1.07) |
| South Sudan           | 2020 | 16000  | 169.7 | 19700 (17200, 22300)    | 209.7 (182.2, 237.1) | -3770 (-6360, -1170)  | 0.81 (0.69, 0.93) |
|                       | 2021 | 17500  | 180.6 | 24000 (20100, 27800)    | 247.9 (208.1, 287.8) | -6510 (-10400, -2650) | 0.73 (0.59, 0.87) |
| Sudan                 | 2020 | 17400  | 40.7  | 20400 (19400, 21400)    | 47.8 (45.4, 50.2)    | -3040 (-4100, -1990)  | 0.85 (0.80, 0.90) |
|                       | 2021 | 18300  | 42.1  | 20400 (19200, 21700)    | 47.1 (44.2, 49.9)    | -2190 (-3450, -922)   | 0.89 (0.83, 0.95) |



**Table S2.** Difference in observed to expected tuberculosis diagnoses during the COVID-19 pandemic for 65  $\geq$  years age group and under 65 age group in 2020 and 2021 for 155 countries.

| Location                               | Year | 65 $\geq$ years            |                   | 65 < years                   |                   | Relative Risk     |
|----------------------------------------|------|----------------------------|-------------------|------------------------------|-------------------|-------------------|
|                                        |      | Difference                 | OE ratio          | Difference                   | OE ratio          |                   |
| Global                                 | 2020 | -272000 (-316000, -229000) | 0.71 (0.67, 0.75) | -1260000 (-1640000, -870000) | 0.81 (0.75, 0.86) | 0.88 (0.81, 0.96) |
|                                        | 2021 | -271000 (-336000, -207000) | 0.73 (0.68, 0.79) | -1160000 (-1680000, -630000) | 0.83 (0.76, 0.90) | 0.88 (0.79, 0.98) |
| Southeast Asia, East Asia, and Oceania | 2020 | -128000 (-165000, -90900)  | 0.70 (0.63, 0.77) | -509000 (-677000, -341000)   | 0.75 (0.68, 0.82) | 0.94 (0.82, 1.07) |
|                                        | 2021 | -174000 (-231000, -117000) | 0.63 (0.53, 0.73) | -705000 (-949000, -462000)   | 0.68 (0.59, 0.77) | 0.93 (0.76, 1.14) |
| East Asia                              | 2020 | -35400 (-46500, -24300)    | 0.82 (0.77, 0.87) | -58900 (-85000, -32800)      | 0.91 (0.87, 0.95) | 0.90 (0.84, 0.97) |
|                                        | 2021 | -34000 (-47500, -20400)    | 0.83 (0.77, 0.89) | -138000 (-169000, -108000)   | 0.79 (0.74, 0.83) | 1.06 (0.97, 1.15) |
| China                                  | 2020 | -35000 (-46100, -24000)    | 0.82 (0.77, 0.87) | -52000 (-76400, -27600)      | 0.91 (0.87, 0.95) | 0.90 (0.84, 0.98) |
|                                        | 2021 | -33700 (-47200, -20100)    | 0.83 (0.77, 0.89) | -129000 (-158000, -101000)   | 0.77 (0.72, 0.81) | 1.08 (0.98, 1.19) |
| Democratic People's Republic of Korea  | 2020 | -390 (-1260, 478)          | 0.91 (0.71, 1.10) | -6930 (-16200, 2340)         | 0.93 (0.83, 1.02) | 0.98 (0.78, 1.25) |
|                                        | 2021 | -313 (-1340, 718)          | 0.92 (0.69, 1.16) | -9080 (-20200, 2080)         | 0.90 (0.79, 1.02) | 1.03 (0.77, 1.34) |
| Southeast Asia                         | 2020 | -92400 (-128000, -57200)   | 0.60 (0.48, 0.72) | -450000 (-616000, -284000)   | 0.67 (0.58, 0.77) | 0.89 (0.70, 1.14) |
|                                        | 2021 | -140000 (-196000, -84900)  | 0.48 (0.34, 0.62) | -567000 (-809000, -325000)   | 0.63 (0.51, 0.76) | 0.76 (0.54, 1.12) |
| Cambodia                               | 2020 | 2.31 (-606, 611)           | 1.00 (0.89, 1.11) | 2610 (-544, 5770)            | 1.13 (0.96, 1.29) | 0.89 (0.74, 1.06) |
|                                        | 2021 | -1710 (-2440, -977)        | 0.69 (0.58, 0.80) | -1320 (-4880, 2240)          | 0.93 (0.75, 1.11) | 0.74 (0.57, 0.95) |
| Indonesia                              | 2020 | -34700 (-44600, -24800)    | 0.50 (0.40, 0.60) | -176000 (-263000, -89500)    | 0.69 (0.56, 0.81) | 0.73 (0.56, 0.97) |
|                                        | 2021 | -47900 (-62400, -33500)    | 0.42 (0.31, 0.54) | -184000 (-301000, -67000)    | 0.71 (0.55, 0.86) | 0.60 (0.43, 0.85) |
| Lao People's Democratic Republic       | 2020 | 68.6 (-88.1, 225)          | 1.04 (0.95, 1.13) | 249 (-73.9, 572)             | 1.04 (0.99, 1.10) | 1.00 (0.90, 1.10) |
|                                        | 2021 | -822 (-1040, -602)         | 0.60 (0.52, 0.68) | -1520 (-1950, -1090)         | 0.76 (0.71, 0.82) | 0.79 (0.68, 0.93) |
| Malaysia                               | 2020 | -522 (-676, -369)          | 0.87 (0.83, 0.90) | -1850 (-3230, -465)          | 0.92 (0.87, 0.98) | 0.94 (0.87, 1.01) |
|                                        | 2021 | -1030 (-1220, -837)        | 0.74 (0.70, 0.78) | -4000 (-5710, -2290)         | 0.83 (0.77, 0.90) | 0.89 (0.81, 0.97) |
| Maldives                               | 2020 | -1.16 (-3.39, 1.07)        | 0.89 (0.68, 1.09) | -54.1 (-85.3, -22.9)         | 0.64 (0.48, 0.81) | 1.37 (0.97, 1.94) |
|                                        | 2021 | -0.547 (-2.83, 1.73)       | 0.94 (0.68, 1.19) | -80.1 (-120, -40.6)          | 0.50 (0.32, 0.67) | 1.88 (1.21, 2.92) |
| Myanmar                                | 2020 | -4820 (-5920, -3720)       | 0.73 (0.68, 0.78) | -25100 (-33200, -16900)      | 0.80 (0.74, 0.85) | 0.92 (0.82, 1.03) |
|                                        | 2021 | -10800 (-12300, -9400)     | 0.43 (0.38, 0.48) | -65700 (-75800, -55700)      | 0.46 (0.41, 0.52) | 0.92 (0.78, 1.12) |
| Philippines                            | 2020 | -50100 (-83700, -16500)    | 0.43 (0.18, 0.68) | -239000 (-380000, -97800)    | 0.50 (0.29, 0.71) | 0.87 (0.43, 1.79) |
|                                        | 2021 | -66400 (-120000, -13200)   | 0.40 (0.10, 0.71) | -267000 (-478000, -55700)    | 0.53 (0.26, 0.80) | 0.75 (0.29, 1.88) |
| Sri Lanka                              | 2020 | -345 (-446, -244)          | 0.81 (0.76, 0.86) | -780 (-1120, -439)           | 0.88 (0.83, 0.93) | 0.92 (0.85, 1.00) |
|                                        | 2021 | -580 (-705, -454)          | 0.69 (0.63, 0.75) | -889 (-1290, -492)           | 0.86 (0.80, 0.92) | 0.81 (0.72, 0.90) |
| Thailand                               | 2020 | -1420 (-3220, 380)         | 0.94 (0.86, 1.01) | -8340 (-11000, -5690)        | 0.89 (0.86, 0.92) | 1.05 (0.96, 1.16) |
|                                        | 2021 | -5490 (-8110, -2860)       | 0.77 (0.67, 0.87) | -27400 (-31300, -23500)      | 0.67 (0.63, 0.71) | 1.14 (0.99, 1.31) |
| Timor-Leste                            | 2020 | -227 (-242, -211)          | 0.67 (0.65, 0.69) | -720 (-1120, -320)           | 0.79 (0.69, 0.90) | 0.84 (0.74, 0.96) |
|                                        | 2021 | -196 (-221, -172)          | 0.75 (0.72, 0.77) | -984 (-1540, -429)           | 0.73 (0.59, 0.86) | 1.03 (0.85, 1.23) |
| Viet Nam                               | 2020 | -259 (-2600, 2080)         | 0.99 (0.87, 1.11) | -1170 (-5220, 2870)          | 0.99 (0.94, 1.03) | 1.00 (0.88, 1.15) |
|                                        | 2021 | -5280 (-8540, -2020)       | 0.74 (0.59, 0.88) | -13800 (-19100, -8400)       | 0.83 (0.77, 0.89) | 0.89 (0.72, 1.08) |
| Oceania                                | 2020 | -37.4 (-72.6, -2.26)       | 0.74 (0.53, 0.95) | -138 (-330, 53.8)            | 0.91 (0.79, 1.03) | 0.81 (0.58, 1.10) |
|                                        | 2021 | -61.9 (-111, -12.6)        | 0.60 (0.35, 0.85) | -359 (-604, -113)            | 0.77 (0.63, 0.91) | 0.77 (0.50, 1.25) |
| Fiji                                   | 2020 | -14.2 (-31, 2.66)          | 0.73 (0.45, 1.00) | 5.55 (-78.4, 89.5)           | 1.01 (0.81, 1.22) | 0.72 (0.48, 1.12) |

|                                                  |      |                       |                   |                         |                   |                    |
|--------------------------------------------------|------|-----------------------|-------------------|-------------------------|-------------------|--------------------|
| Kiribati                                         | 2021 | -29 (-51, -7.07)      | 0.48 (0.21, 0.75) | -131 (-239, -22.2)      | 0.70 (0.50, 0.91) | 0.68 (0.36, 1.27)  |
|                                                  | 2020 | 4 (-5.95, 13.9)       | 1.13 (0.78, 1.49) | -2.2 (-109, 105)        | 0.99 (0.69, 1.30) | 1.14 (0.72, 1.76)  |
|                                                  | 2021 | -10.8 (-23.5, 1.96)   | 0.66 (0.33, 0.99) | -33.4 (-158, 91.2)      | 0.90 (0.56, 1.25) | 0.73 (0.39, 1.31)  |
| Marshall Islands                                 | 2020 | -13.2 (-39.5, 13)     | 0.40 (0.00, 1.15) | -109 (-233, 15.9)       | 0.57 (0.20, 0.94) | 0.71 (0.10, 5.13)  |
|                                                  | 2021 | -21.4 (-60.8, 18.1)   | 0.22 (0.00, 0.89) | -174 (-346, -2.96)      | 0.39 (0.02, 0.77) | 0.56 (0.02, 12.22) |
|                                                  | 2020 | -3.56 (-7.5, 0.376)   | 0.46 (0.05, 0.86) | 16.4 (-18.5, 51.4)      | 1.21 (0.72, 1.69) | 0.38 (0.14, 1.06)  |
| Solomon Islands                                  | 2021 |                       |                   |                         |                   |                    |
|                                                  | 2020 | -0.43 (-11.3, 10.4)   | 0.98 (0.39, 1.56) | -58.7 (-97.6, -19.7)    | 0.84 (0.74, 0.94) | 1.17 (0.63, 2.10)  |
|                                                  | 2021 | 14.3 (1.78, 26.8)     | 1.81 (0.86, 2.76) | -25.3 (-72.4, 21.9)     | 0.93 (0.81, 1.06) | 1.94 (1.11, 3.23)  |
| Vanuatu                                          | 2020 | -10 (-15.8, -4.23)    | 0.29 (0.06, 0.51) | 9.6 (6, 13.2)           | 1.14 (1.08, 1.19) | 0.25 (0.11, 0.56)  |
|                                                  | 2021 | -8.72 (-16.1, -1.34)  | 0.41 (0.09, 0.73) | -1.99 (-6.02, 2.04)     | 0.97 (0.91, 1.03) | 0.42 (0.20, 0.92)  |
|                                                  | 2020 | -5350 (-6240, -4460)  | 0.72 (0.68, 0.76) | -33600 (-42300, -24900) | 0.78 (0.73, 0.83) | 0.92 (0.85, 1.00)  |
| Central Europe, Eastern Europe, and Central Asia | 2021 | -4680 (-5760, -3610)  | 0.75 (0.70, 0.80) | -25100 (-34900, -15200) | 0.83 (0.77, 0.89) | 0.91 (0.82, 1.01)  |
|                                                  | 2020 | -1760 (-2060, -1450)  | 0.72 (0.68, 0.76) | -8080 (-10700, -5420)   | 0.81 (0.76, 0.87) | 0.89 (0.81, 0.98)  |
|                                                  | 2021 | -1660 (-2050, -1260)  | 0.75 (0.70, 0.80) | -5430 (-8440, -2410)    | 0.87 (0.80, 0.94) | 0.87 (0.78, 0.96)  |
| Armenia                                          | 2020 | -6.11 (-16.2, 3.94)   | 0.90 (0.74, 1.06) | -155 (-198, -113)       | 0.70 (0.63, 0.77) | 1.29 (1.05, 1.59)  |
|                                                  | 2021 | -6.81 (-17.3, 3.71)   | 0.87 (0.69, 1.06) | -81 (-125, -37.1)       | 0.82 (0.73, 0.91) | 1.07 (0.84, 1.35)  |
|                                                  | 2020 | -97.7 (-134, -61.7)   | 0.65 (0.55, 0.76) | -774 (-939, -609)       | 0.75 (0.71, 0.80) | 0.87 (0.72, 1.02)  |
| Azerbaijan                                       | 2021 | -113 (-160, -66)      | 0.63 (0.51, 0.75) | -651 (-839, -464)       | 0.78 (0.73, 0.84) | 0.80 (0.65, 0.98)  |
|                                                  | 2020 | -73.5 (-120, -26.9)   | 0.74 (0.59, 0.88) | -253 (-373, -133)       | 0.86 (0.80, 0.92) | 0.85 (0.70, 1.04)  |
|                                                  | 2021 | -96 (-150, -41.6)     | 0.64 (0.48, 0.81) | -291 (-424, -158)       | 0.83 (0.76, 0.90) | 0.77 (0.59, 1.00)  |
| Kazakhstan                                       | 2020 | -298 (-500, -96.7)    | 0.79 (0.67, 0.92) | -720 (-2660, 1220)      | 0.93 (0.74, 1.12) | 0.86 (0.67, 1.11)  |
|                                                  | 2021 | -228 (-480, 24.7)     | 0.85 (0.69, 1.00) | -15.8 (-2180, 2150)     | 1.00 (0.76, 1.23) | 0.85 (0.61, 1.16)  |
|                                                  | 2020 | -438 (-597, -280)     | 0.57 (0.45, 0.69) | -2020 (-2830, -1210)    | 0.64 (0.53, 0.76) | 0.88 (0.68, 1.15)  |
| Kyrgyzstan                                       | 2021 | -537 (-762, -311)     | 0.55 (0.40, 0.69) | -1670 (-2640, -709)     | 0.70 (0.56, 0.85) | 0.78 (0.56, 1.06)  |
|                                                  | 2020 | -32 (-57.9, -6.14)    | 0.87 (0.77, 0.97) | -173 (-514, 168)        | 0.95 (0.87, 1.04) | 0.91 (0.77, 1.05)  |
|                                                  | 2021 | -103 (-136, -70.6)    | 0.59 (0.49, 0.69) | -1190 (-1590, -784)     | 0.68 (0.60, 0.77) | 0.86 (0.69, 1.06)  |
| Tajikistan                                       | 2020 | -180 (-262, -98.3)    | 0.69 (0.58, 0.81) | -1600 (-1920, -1290)    | 0.70 (0.65, 0.75) | 0.99 (0.83, 1.20)  |
|                                                  | 2021 | -188 (-293, -83.5)    | 0.70 (0.55, 0.84) | -1620 (-1990, -1240)    | 0.70 (0.64, 0.76) | 1.00 (0.80, 1.26)  |
|                                                  | 2020 | -629 (-761, -497)     | 0.74 (0.69, 0.79) | -2380 (-3920, -836)     | 0.81 (0.70, 0.92) | 0.91 (0.78, 1.05)  |
| Uzbekistan                                       | 2021 | -384 (-548, -221)     | 0.85 (0.78, 0.91) | 86.2 (-1690, 1860)      | 1.01 (0.86, 1.15) | 0.84 (0.72, 0.99)  |
|                                                  | 2020 | -1370 (-1550, -1180)  | 0.67 (0.64, 0.71) | -4870 (-5320, -4420)    | 0.70 (0.68, 0.72) | 0.96 (0.90, 1.03)  |
|                                                  | 2021 | -1250 (-1460, -1040)  | 0.68 (0.64, 0.72) | -3290 (-3800, -2790)    | 0.78 (0.75, 0.81) | 0.87 (0.80, 0.93)  |
| Albania                                          | 2020 | -60.3 (-83.6, -36.9)  | 0.48 (0.34, 0.62) | -132 (-182, -81.3)      | 0.62 (0.50, 0.73) | 0.78 (0.56, 1.10)  |
|                                                  | 2021 | -60.2 (-89.3, -31)    | 0.50 (0.33, 0.67) | -93.4 (-154, -32.8)     | 0.73 (0.58, 0.88) | 0.69 (0.45, 1.00)  |
|                                                  | 2020 | -13.6 (-79.5, 52.2)   | 0.90 (0.42, 1.37) | -152 (-256, -49.4)      | 0.64 (0.45, 0.84) | 1.39 (0.74, 2.49)  |
| Bosnia and Herzegovina                           | 2021 | 4.97 (-57.6, 67.5)    | 1.05 (0.44, 1.66) | -102 (-215, 11.2)       | 0.74 (0.49, 0.99) | 1.42 (0.69, 2.76)  |
|                                                  | 2020 | -15.8 (-30.9, -0.677) | 0.93 (0.87, 1.00) | -227 (-282, -173)       | 0.75 (0.70, 0.80) | 1.25 (1.13, 1.37)  |
|                                                  | 2021 | -93.9 (-111, -77.1)   | 0.58 (0.53, 0.64) | -278 (-338, -218)       | 0.67 (0.61, 0.73) | 0.87 (0.76, 1.00)  |
| Bulgaria                                         | 2020 | -38.4 (-53.8, -22.9)  | 0.65 (0.53, 0.76) | -80.1 (-101, -58.8)     | 0.58 (0.50, 0.67) | 1.11 (0.90, 1.38)  |
|                                                  | 2021 | -43.2 (-60, -26.3)    | 0.56 (0.44, 0.69) | -74.5 (-97.9, -51.2)    | 0.58 (0.48, 0.68) | 0.98 (0.74, 1.28)  |

|                          |      |                      |                   |                         |                   |                   |
|--------------------------|------|----------------------|-------------------|-------------------------|-------------------|-------------------|
| Czechia                  | 2020 | -4.49 (-20.4, 11.4)  | 0.95 (0.80, 1.11) | -94.8 (-136, -53.3)     | 0.75 (0.65, 0.84) | 1.28 (1.04, 1.58) |
|                          | 2021 | -13.2 (-30.8, 4.37)  | 0.86 (0.68, 1.03) | -89 (-140, -38.3)       | 0.77 (0.65, 0.88) | 1.12 (0.88, 1.45) |
| Hungary                  | 2020 | -21.8 (-40.7, -2.98) | 0.82 (0.69, 0.96) | -66.5 (-119, -14.2)     | 0.82 (0.69, 0.95) | 1.01 (0.80, 1.27) |
|                          | 2021 | -33.3 (-53.7, -12.9) | 0.70 (0.55, 0.86) | -87.1 (-143, -30.9)     | 0.74 (0.59, 0.88) | 0.95 (0.74, 1.31) |
| North Macedonia          | 2020 | -10.8 (-16, -5.49)   | 0.65 (0.51, 0.79) | -35.5 (-48.8, -22.2)    | 0.78 (0.70, 0.85) | 0.84 (0.66, 1.06) |
|                          | 2021 | -0.727 (-6.4, 4.95)  | 0.97 (0.77, 1.18) | -28.4 (-43.2, -13.6)    | 0.81 (0.72, 0.90) | 1.21 (0.96, 1.56) |
| Poland                   | 2020 | -371 (-414, -328)    | 0.69 (0.66, 0.72) | -1120 (-1270, -976)     | 0.68 (0.65, 0.72) | 1.01 (0.95, 1.08) |
|                          | 2021 | -332 (-380, -284)    | 0.70 (0.67, 0.74) | -557 (-723, -391)       | 0.83 (0.79, 0.88) | 0.84 (0.78, 0.91) |
| Romania                  | 2020 | -604 (-759, -449)    | 0.65 (0.57, 0.72) | -2520 (-2920, -2130)    | 0.72 (0.68, 0.76) | 0.90 (0.80, 1.03) |
|                          | 2021 | -446 (-623, -269)    | 0.73 (0.63, 0.82) | -1660 (-2110, -1220)    | 0.80 (0.76, 0.85) | 0.90 (0.79, 1.04) |
| Serbia                   | 2020 | -219 (-270, -168)    | 0.33 (0.24, 0.42) | -387 (-433, -342)       | 0.46 (0.42, 0.51) | 0.70 (0.53, 0.95) |
|                          | 2021 | -204 (-261, -146)    | 0.32 (0.21, 0.43) | -302 (-353, -252)       | 0.54 (0.48, 0.59) | 0.60 (0.42, 0.84) |
| Slovakia                 | 2020 | -8.04 (-26.3, 10.3)  | 0.84 (0.51, 1.17) | -37.5 (-58.3, -16.6)    | 0.75 (0.63, 0.87) | 1.13 (0.73, 1.72) |
|                          | 2021 | -28.6 (-48.5, -8.63) | 0.39 (0.12, 0.65) | -14.3 (-36.9, 8.36)     | 0.89 (0.74, 1.05) | 0.43 (0.20, 0.83) |
| Slovenia                 | 2020 | -0.444 (-7.53, 6.64) | 0.99 (0.81, 1.17) | -15.7 (-22.6, -8.73)    | 0.71 (0.60, 0.82) | 1.40 (1.09, 1.80) |
|                          | 2021 | -2.78 (-10.7, 5.1)   | 0.92 (0.71, 1.13) | -4.33 (-12.1, 3.45)     | 0.91 (0.77, 1.06) | 1.01 (0.77, 1.35) |
| Eastern Europe           | 2020 | -2230 (-3040, -1420) | 0.74 (0.66, 0.82) | -20700 (-28900, -12400) | 0.78 (0.70, 0.86) | 0.95 (0.82, 1.11) |
|                          | 2021 | -1780 (-2750, -804)  | 0.79 (0.69, 0.89) | -16300 (-25700, -7000)  | 0.82 (0.72, 0.91) | 0.97 (0.82, 1.15) |
| Belarus                  | 2020 | -126 (-169, -82.5)   | 0.61 (0.51, 0.72) | -289 (-401, -178)       | 0.82 (0.76, 0.89) | 0.75 (0.61, 0.88) |
|                          | 2021 | -91.2 (-140, -42.8)  | 0.70 (0.57, 0.83) | -125 (-242, -8.9)       | 0.91 (0.84, 0.99) | 0.77 (0.62, 0.95) |
| Estonia                  | 2020 | 3 (-6.3, 12.3)       | 1.09 (0.81, 1.36) | -6.96 (-15.8, 1.91)     | 0.92 (0.83, 1.02) | 1.18 (0.89, 1.51) |
|                          | 2021 | -3.53 (-14.2, 7.16)  | 0.89 (0.59, 1.20) | 2.63 (-6.7, 12)         | 1.03 (0.91, 1.15) | 0.87 (0.62, 1.21) |
| Latvia                   | 2020 |                      |                   |                         |                   |                   |
|                          | 2021 | -28.1 (-66.1, 9.82)  | 0.52 (0.06, 0.99) | -74 (-112, -35.9)       | 0.76 (0.65, 0.87) | 0.69 (0.27, 1.72) |
| Lithuania                | 2020 | -37.4 (-61.2, -13.5) | 0.76 (0.63, 0.89) | -236 (-306, -165)       | 0.71 (0.64, 0.79) | 1.07 (0.88, 1.30) |
|                          | 2021 | -40.2 (-66.9, -13.5) | 0.73 (0.57, 0.88) | -224 (-302, -145)       | 0.71 (0.62, 0.79) | 1.03 (0.80, 1.30) |
| Republic of Moldova      | 2020 | -98.5 (-128, -69.6)  | 0.59 (0.50, 0.69) | -727 (-844, -609)       | 0.70 (0.66, 0.74) | 0.85 (0.71, 1.00) |
|                          | 2021 | -52.1 (-86.5, -17.7) | 0.78 (0.65, 0.91) | -312 (-442, -182)       | 0.86 (0.81, 0.91) | 0.91 (0.76, 1.09) |
| Russian Federation       | 2020 | -1310 (-2120, -504)  | 0.77 (0.65, 0.90) | -12900 (-21100, -4740)  | 0.81 (0.70, 0.92) | 0.96 (0.79, 1.16) |
|                          | 2021 | -1280 (-2250, -318)  | 0.78 (0.63, 0.93) | -11100 (-20400, -1820)  | 0.82 (0.69, 0.96) | 0.94 (0.74, 1.21) |
| Ukraine                  | 2020 | -600 (-686, -515)    | 0.70 (0.66, 0.74) | -6130 (-7070, -5190)    | 0.72 (0.69, 0.76) | 0.97 (0.90, 1.04) |
|                          | 2021 | -278 (-376, -180)    | 0.86 (0.81, 0.90) | -4520 (-5590, -3440)    | 0.79 (0.74, 0.83) | 1.09 (1.01, 1.18) |
| High-income              | 2020 | -5270 (-6140, -4410) | 0.85 (0.82, 0.87) | -7640 (-9350, -5940)    | 0.89 (0.87, 0.91) | 0.95 (0.92, 0.99) |
|                          | 2021 | -5060 (-6110, -4010) | 0.85 (0.82, 0.88) | -5360 (-7470, -3250)    | 0.92 (0.89, 0.95) | 0.92 (0.88, 0.96) |
| High-income Asia Pacific | 2020 | -3180 (-4000, -2350) | 0.87 (0.83, 0.90) | -1880 (-2460, -1300)    | 0.91 (0.88, 0.94) | 0.95 (0.91, 1.00) |
|                          | 2021 | -3830 (-4830, -2830) | 0.84 (0.80, 0.88) | -2130 (-2760, -1490)    | 0.89 (0.86, 0.92) | 0.94 (0.89, 1.00) |
| Brunei Darussalam        | 2020 | 15.3 (8.09, 22.5)    | 1.26 (1.12, 1.40) | 43.5 (17.8, 69.1)       | 1.21 (1.07, 1.34) | 1.05 (0.89, 1.23) |
|                          | 2021 | -12.3 (-21.5, -3.04) | 0.80 (0.67, 0.94) | -18.3 (-50.5, 13.9)     | 0.92 (0.78, 1.06) | 0.88 (0.70, 1.11) |
| Japan                    | 2020 | -487 (-628, -346)    | 0.95 (0.93, 0.96) | -300 (-590, -10.9)      | 0.94 (0.88, 1.00) | 1.01 (0.95, 1.08) |
|                          | 2021 | -707 (-865, -549)    | 0.92 (0.90, 0.94) | -538 (-866, -209)       | 0.88 (0.81, 0.95) | 1.04 (0.96, 1.12) |
| Republic of Korea        | 2020 | -2700 (-3510, -1890) | 0.81 (0.76, 0.86) | -1770 (-2240, -1290)    | 0.88 (0.84, 0.91) | 0.92 (0.86, 0.99) |

|                |      |                      |                   |                      |                   |                   |
|----------------|------|----------------------|-------------------|----------------------|-------------------|-------------------|
| Singapore      | 2021 | -3090 (-4070, -2110) | 0.78 (0.72, 0.84) | -1830 (-2340, -1310) | 0.86 (0.82, 0.89) | 0.91 (0.84, 0.99) |
|                | 2020 | -7.99 (-91.2, 75.2)  | 0.99 (0.86, 1.12) | 147 (-5.88, 299)     | 1.09 (0.99, 1.18) | 0.91 (0.77, 1.05) |
|                | 2021 | -18.9 (-121, 83.5)   | 0.97 (0.81, 1.13) | 255 (71.4, 438)      | 1.15 (1.03, 1.27) | 0.84 (0.70, 1.02) |
| Australasia    | 2020 | -5.59 (-36.2, 25)    | 0.98 (0.89, 1.07) | 85.2 (20.7, 150)     | 1.05 (1.01, 1.10) | 0.93 (0.84, 1.03) |
|                | 2021 | -50.3 (-89, -11.5)   | 0.85 (0.75, 0.96) | -104 (-184, -23.7)   | 0.93 (0.89, 0.98) | 0.91 (0.79, 1.04) |
|                | 2020 | -11.7 (-40.1, 16.6)  | 0.96 (0.86, 1.06) | 77.4 (21.2, 134)     | 1.06 (1.02, 1.11) | 0.90 (0.80, 1.01) |
| Australia      | 2021 | -38.1 (-74.1, -2.05) | 0.87 (0.75, 0.98) | -97.4 (-167, -27.7)  | 0.93 (0.87, 0.98) | 0.94 (0.81, 1.09) |
|                | 2020 | 6.15 (-5.36, 17.7)   | 1.11 (0.90, 1.32) | 7.85 (-23.8, 39.5)   | 1.03 (0.91, 1.14) | 1.08 (0.86, 1.33) |
|                | 2021 | -12.2 (-26.4, 2.02)  | 0.79 (0.58, 1.01) | -6.27 (-45.5, 32.9)  | 0.98 (0.84, 1.11) | 0.81 (0.61, 1.10) |
| New Zealand    | 2020 | -883 (-1100, -671)   | 0.83 (0.79, 0.86) | -2920 (-3910, -1940) | 0.88 (0.84, 0.92) | 0.94 (0.88, 1.00) |
|                | 2021 | -528 (-788, -267)    | 0.89 (0.84, 0.94) | -2470 (-3680, -1250) | 0.89 (0.84, 0.94) | 1.00 (0.92, 1.08) |
|                | 2020 | 1.06 (-12.7, 14.8)   | 1.01 (0.86, 1.17) | -68.3 (-122, -14.2)  | 0.82 (0.70, 0.95) | 1.23 (0.99, 1.51) |
| Western Europe | 2021 | 1.8 (-13.8, 17.4)    | 1.02 (0.84, 1.21) | -41.7 (-104, 20.9)   | 0.89 (0.73, 1.05) | 1.15 (0.89, 1.47) |
|                | 2020 | -4.03 (-31.1, 23)    | 0.97 (0.75, 1.19) | -111 (-150, -71)     | 0.87 (0.82, 0.91) | 1.11 (0.89, 1.38) |
|                | 2021 | -18.6 (-50.3, 13)    | 0.84 (0.60, 1.09) | -18.9 (-67.3, 29.5)  | 0.98 (0.92, 1.03) | 0.86 (0.63, 1.14) |
| Belgium        | 2020 | -3.94 (-11.3, 3.39)  | 0.86 (0.62, 1.10) | -27.2 (-57.3, 2.86)  | 0.88 (0.75, 1.00) | 0.98 (0.71, 1.33) |
|                | 2021 | 2.11 (-6.71, 10.9)   | 1.08 (0.75, 1.40) | -48.9 (-83.6, -14.1) | 0.78 (0.64, 0.92) | 1.39 (1.00, 1.96) |
|                | 2020 | -1.59 (-21, 17.9)    | 0.98 (0.76, 1.20) | -38 (-56.8, -19.2)   | 0.71 (0.59, 0.83) | 1.37 (1.01, 1.82) |
| Finland        | 2021 | -6.18 (-28.3, 16)    | 0.93 (0.67, 1.18) | -25.7 (-48.1, -3.33) | 0.80 (0.65, 0.96) | 1.15 (0.83, 1.63) |
|                | 2020 | -89.8 (-149, -30.1)  | 0.89 (0.82, 0.96) | -141 (-508, 227)     | 0.97 (0.88, 1.05) | 0.92 (0.82, 1.04) |
|                | 2021 | -32.5 (-102, 37.1)   | 0.96 (0.87, 1.04) | -740 (-1200, -282)   | 0.83 (0.74, 0.93) | 1.15 (0.99, 1.33) |
| France         | 2020 | -12.4 (-79.1, 54.3)  | 0.98 (0.90, 1.07) | -531 (-829, -234)    | 0.87 (0.81, 0.94) | 1.13 (1.00, 1.25) |
|                | 2021 | -73.4 (-154, 7.52)   | 0.90 (0.80, 1.00) | -610 (-981, -239)    | 0.85 (0.77, 0.94) | 1.06 (0.92, 1.22) |
|                | 2020 | -29.5 (-45.4, -13.7) | 0.72 (0.59, 0.85) | 18.6 (-56.6, 93.8)   | 1.06 (0.82, 1.29) | 0.68 (0.52, 0.92) |
| Greece         | 2021 | -71.9 (-90.1, -53.7) | 0.29 (0.19, 0.38) | -132 (-223, -41.5)   | 0.60 (0.38, 0.81) | 0.48 (0.29, 0.78) |
|                | 2020 | -20.5 (-31.1, -9.88) | 0.68 (0.54, 0.81) | 1.91 (-27.8, 31.7)   | 1.01 (0.86, 1.16) | 0.67 (0.52, 0.85) |
|                | 2021 | -35.8 (-48.9, -22.7) | 0.45 (0.31, 0.58) | 2.63 (-31.2, 36.5)   | 1.01 (0.83, 1.20) | 0.44 (0.32, 0.63) |
| Ireland        | 2020 | -22.3 (-51.6, 7)     | 0.62 (0.22, 1.01) | -38 (-70.1, -5.9)    | 0.77 (0.60, 0.94) | 0.80 (0.42, 1.60) |
|                | 2021 | -13.2 (-49.1, 22.7)  | 0.78 (0.24, 1.31) | -10.7 (-46.2, 24.8)  | 0.93 (0.71, 1.15) | 0.84 (0.40, 1.82) |
|                | 2020 | -259 (-355, -163)    | 0.61 (0.50, 0.72) | -1030 (-1580, -471)  | 0.66 (0.51, 0.81) | 0.92 (0.70, 1.23) |
| Italy          | 2021 | -258 (-393, -124)    | 0.63 (0.47, 0.78) | -838 (-1580, -94.1)  | 0.72 (0.51, 0.93) | 0.87 (0.60, 1.26) |
|                | 2020 | -13.9 (-28.6, 0.891) | 0.87 (0.73, 1.00) | -106 (-150, -62.7)   | 0.85 (0.79, 0.90) | 1.02 (0.87, 1.20) |
|                | 2021 | 26.3 (9.26, 43.3)    | 1.27 (1.07, 1.46) | -84.2 (-137, -31.8)  | 0.88 (0.81, 0.95) | 1.44 (1.20, 1.73) |
| Netherlands    | 2020 | -3.67 (-10.4, 3.11)  | 0.79 (0.45, 1.13) | 4.15 (-11.5, 19.8)   | 1.03 (0.92, 1.14) | 0.77 (0.50, 1.15) |
|                | 2021 | -0.135 (-8.02, 7.75) | 0.99 (0.53, 1.45) | 10.1 (-6.21, 26.5)   | 1.08 (0.95, 1.22) | 0.92 (0.57, 1.52) |
|                | 2020 | -75.3 (-90.4, -60.2) | 0.81 (0.78, 0.84) | -62.8 (-233, 107)    | 0.95 (0.82, 1.08) | 0.85 (0.74, 0.98) |
| Portugal       | 2021 | 23.9 (6.45, 41.4)    | 1.06 (1.02, 1.11) | -47.3 (-241, 146)    | 0.96 (0.80, 1.12) | 1.11 (0.93, 1.31) |
|                | 2020 | -258 (-408, -108)    | 0.71 (0.57, 0.85) | -755 (-1180, -335)   | 0.77 (0.65, 0.88) | 0.93 (0.73, 1.18) |
|                | 2021 | -120 (-297, 56.4)    | 0.86 (0.68, 1.05) | -361 (-852, 130)     | 0.89 (0.74, 1.03) | 0.98 (0.75, 1.29) |
| Spain          | 2020 | -9.76 (-16.2, -3.37) | 0.82 (0.72, 0.93) | -120 (-258, 18.6)    | 0.72 (0.45, 1.00) | 1.13 (0.77, 1.69) |
|                | 2021 | 12.8 (5.38, 20.3)    | 1.24 (1.09, 1.40) | -94.2 (-251, 62.4)   | 0.77 (0.44, 1.11) | 1.61 (1.03, 2.52) |

|                             |      |                        |                   |                         |                   |                   |
|-----------------------------|------|------------------------|-------------------|-------------------------|-------------------|-------------------|
| Switzerland                 | 2020 | -26.8 (-39.9, -13.8)   | 0.65 (0.51, 0.79) | -58.7 (-158, 40.7)      | 0.85 (0.62, 1.08) | 0.76 (0.54, 1.09) |
|                             | 2021 | -19.8 (-35.7, -3.9)    | 0.75 (0.57, 0.92) | -61.5 (-180, 56.6)      | 0.84 (0.56, 1.12) | 0.89 (0.59, 1.30) |
| United Kingdom              | 2020 | -54.2 (-98.6, -9.87)   | 0.92 (0.86, 0.98) | 135 (-295, 565)         | 1.04 (0.92, 1.15) | 0.89 (0.77, 1.00) |
|                             | 2021 | 55.8 (6.17, 105)       | 1.09 (1.01, 1.17) | 636 (157, 1120)         | 1.18 (1.03, 1.33) | 0.92 (0.80, 1.06) |
| Southern Latin America      | 2020 | -576 (-707, -445)      | 0.71 (0.65, 0.76) | -1910 (-3120, -686)     | 0.87 (0.79, 0.95) | 0.81 (0.72, 0.92) |
|                             | 2021 | -359 (-525, -194)      | 0.83 (0.75, 0.90) | -59.9 (-1610, 1490)     | 1.00 (0.90, 1.10) | 0.83 (0.73, 0.95) |
| Argentina                   | 2020 | -371 (-482, -259)      | 0.69 (0.62, 0.77) | -1420 (-2620, -216)     | 0.87 (0.77, 0.97) | 0.79 (0.68, 0.93) |
|                             | 2021 | -204 (-346, -61.9)     | 0.84 (0.74, 0.94) | 476 (-1050, 2000)       | 1.04 (0.91, 1.17) | 0.81 (0.68, 0.96) |
| Chile                       | 2020 | -202 (-266, -139)      | 0.67 (0.59, 0.76) | -406 (-602, -209)       | 0.84 (0.77, 0.91) | 0.80 (0.68, 0.92) |
|                             | 2021 | -123 (-201, -44.3)     | 0.81 (0.70, 0.92) | -435 (-686, -185)       | 0.84 (0.76, 0.92) | 0.96 (0.81, 1.13) |
| Uruguay                     | 2020 | -3.28 (-28.7, 22.1)    | 0.98 (0.80, 1.15) | -81.6 (-138, -25.7)     | 0.91 (0.85, 0.97) | 1.07 (0.89, 1.30) |
|                             | 2021 | -32.7 (-65.2, -0.0793) | 0.78 (0.59, 0.97) | -101 (-170, -31.4)      | 0.89 (0.82, 0.96) | 0.88 (0.67, 1.12) |
| High-income North America   | 2020 | -630 (-694, -565)      | 0.77 (0.75, 0.79) | -1020 (-1350, -689)     | 0.87 (0.83, 0.91) | 0.89 (0.84, 0.94) |
|                             | 2021 | -294 (-372, -215)      | 0.90 (0.87, 0.92) | -605 (-1000, -206)      | 0.92 (0.87, 0.97) | 0.97 (0.91, 1.03) |
| Canada                      | 2020 | -96.6 (-125, -67.9)    | 0.80 (0.75, 0.86) | -184 (-345, -22.9)      | 0.88 (0.78, 0.98) | 0.91 (0.81, 1.04) |
|                             | 2021 | -62.6 (-98.3, -26.8)   | 0.88 (0.81, 0.94) | -233 (-436, -30)        | 0.86 (0.74, 0.97) | 1.03 (0.87, 1.20) |
| United States of America    | 2020 | -533 (-591, -476)      | 0.77 (0.75, 0.79) | -837 (-1130, -547)      | 0.87 (0.83, 0.91) | 0.88 (0.83, 0.93) |
|                             | 2021 | -231 (-301, -161)      | 0.90 (0.87, 0.93) | -372 (-715, -28.4)      | 0.94 (0.89, 0.99) | 0.96 (0.90, 1.02) |
| Latin America and Caribbean | 2020 | -6980 (-7530, -6420)   | 0.74 (0.72, 0.75) | -30100 (-39500, -20600) | 0.85 (0.81, 0.90) | 0.86 (0.82, 0.91) |
|                             | 2021 | -4470 (-5170, -3770)   | 0.84 (0.81, 0.86) | -25200 (-37000, -13300) | 0.88 (0.83, 0.93) | 0.95 (0.88, 1.01) |
| Caribbean                   | 2020 | -247 (-443, -50.1)     | 0.81 (0.68, 0.95) | -2970 (-4380, -1560)    | 0.83 (0.76, 0.90) | 0.98 (0.81, 1.17) |
|                             | 2021 | -232 (-492, 28.6)      | 0.83 (0.65, 1.00) | -1700 (-3430, 32.2)     | 0.90 (0.80, 1.00) | 0.92 (0.72, 1.16) |
| Belize                      | 2020 | -3.34 (-7.65, 0.985)   | 0.64 (0.27, 1.01) | -14.4 (-47.7, 18.9)     | 0.85 (0.52, 1.17) | 0.76 (0.37, 1.55) |
|                             | 2021 | -3.59 (-8.34, 1.16)    | 0.58 (0.16, 1.00) | -20.9 (-61.7, 20)       | 0.78 (0.41, 1.16) | 0.74 (0.33, 1.83) |
| Cuba                        | 2020 | -27.3 (-53.1, -1.43)   | 0.74 (0.53, 0.95) | -32.7 (-75.5, 9.99)     | 0.94 (0.87, 1.02) | 0.78 (0.58, 1.03) |
|                             | 2021 | -24.1 (-53.9, 5.68)    | 0.76 (0.50, 1.02) | -100 (-151, -49.7)      | 0.82 (0.74, 0.90) | 0.93 (0.64, 1.33) |
| Dominican Republic          | 2020 | -180 (-366, 6.05)      | 0.60 (0.27, 0.92) | -1450 (-2630, -266)     | 0.64 (0.41, 0.88) | 0.93 (0.48, 1.84) |
|                             | 2021 | -86.1 (-335, 163)      | 0.82 (0.36, 1.29) | -986 (-2490, 515)       | 0.77 (0.46, 1.08) | 1.07 (0.55, 2.09) |
| Guyana                      | 2020 | -15.1 (-26.1, -4.17)   | 0.57 (0.33, 0.80) | -59.2 (-109, -9.25)     | 0.87 (0.77, 0.97) | 0.65 (0.43, 0.98) |
|                             | 2021 | 8.97 (-3.37, 21.3)     | 1.27 (0.85, 1.69) | -43.8 (-101, 13.8)      | 0.90 (0.78, 1.02) | 1.41 (0.98, 1.97) |
| Haiti                       | 2020 | 6.92 (-48.2, 62)       | 1.01 (0.93, 1.10) | -1380 (-2130, -626)     | 0.89 (0.83, 0.94) | 1.14 (1.03, 1.28) |
|                             | 2021 | -81 (-145, -16.7)      | 0.87 (0.78, 0.97) | -483 (-1340, 377)       | 0.96 (0.88, 1.03) | 0.91 (0.80, 1.03) |
| Jamaica                     | 2020 | -10.9 (-14.1, -7.81)   | 0.22 (0.11, 0.32) | -11.8 (-36.7, 13.2)     | 0.83 (0.50, 1.16) | 0.26 (0.14, 0.46) |
|                             | 2021 | -8.63 (-13.3, -4.01)   | 0.48 (0.29, 0.67) | -17.7 (-46.4, 10.9)     | 0.73 (0.37, 1.10) | 0.66 (0.35, 1.22) |
| Suriname                    | 2020 | -16.4 (-23.7, -9.15)   | 0.23 (0.07, 0.40) | -30 (-64.5, 4.49)       | 0.77 (0.54, 1.00) | 0.30 (0.13, 0.69) |
|                             | 2021 | -20 (-31.5, -8.51)     | 0.26 (0.04, 0.48) | -41.7 (-83.1, -0.246)   | 0.68 (0.42, 0.94) | 0.38 (0.15, 0.94) |
| Trinidad and Tobago         | 2020 | -0.574 (-12.1, 10.9)   | 0.98 (0.68, 1.29) | 6.91 (-26.6, 40.4)      | 1.04 (0.85, 1.23) | 0.95 (0.67, 1.36) |
|                             | 2021 | -17.1 (-31.6, -2.57)   | 0.56 (0.28, 0.84) | -8.21 (-47.3, 30.9)     | 0.95 (0.73, 1.17) | 0.59 (0.36, 1.03) |
| Andean Latin America        | 2020 | -2310 (-2630, -1990)   | 0.64 (0.60, 0.68) | -8850 (-11500, -6200)   | 0.79 (0.74, 0.85) | 0.81 (0.73, 0.88) |
|                             | 2021 | -1520 (-1920, -1120)   | 0.77 (0.72, 0.82) | -7790 (-11100, -4460)   | 0.82 (0.76, 0.89) | 0.93 (0.83, 1.04) |
|                             | 2020 | -382 (-471, -292)      | 0.70 (0.64, 0.76) | -913 (-1230, -597)      | 0.85 (0.80, 0.90) | 0.83 (0.75, 0.91) |

|                                    |      |                      |                   |                         |                   |                   |
|------------------------------------|------|----------------------|-------------------|-------------------------|-------------------|-------------------|
| Bolivia (Plurinational State of)   | 2021 | -125 (-231, -18.8)   | 0.90 (0.82, 0.98) | 42.5 (-329, 414)        | 1.01 (0.94, 1.07) | 0.89 (0.80, 1.00) |
| Ecuador                            | 2020 | -262 (-336, -188)    | 0.68 (0.60, 0.75) | -879 (-1280, -480)      | 0.84 (0.78, 0.91) | 0.81 (0.71, 0.92) |
|                                    | 2021 | -297 (-389, -205)    | 0.65 (0.56, 0.73) | -715 (-1210, -217)      | 0.88 (0.80, 0.96) | 0.74 (0.62, 0.87) |
| Peru                               | 2020 | -1670 (-1970, -1370) | 0.61 (0.56, 0.67) | -7060 (-9670, -4460)    | 0.78 (0.70, 0.85) | 0.79 (0.69, 0.90) |
|                                    | 2021 | -1100 (-1470, -725)  | 0.75 (0.68, 0.83) | -7110 (-10400, -3840)   | 0.78 (0.69, 0.87) | 0.97 (0.83, 1.12) |
| Central Latin America              | 2020 | -3100 (-3320, -2870) | 0.68 (0.66, 0.70) | -11700 (-14000, -9360)  | 0.80 (0.77, 0.84) | 0.84 (0.80, 0.89) |
|                                    | 2021 | -2050 (-2330, -1770) | 0.79 (0.76, 0.82) | -9260 (-12300, -6180)   | 0.85 (0.80, 0.90) | 0.93 (0.88, 0.99) |
| Colombia                           | 2020 | -824 (-943, -705)    | 0.74 (0.70, 0.77) | -285 (-727, 157)        | 0.98 (0.94, 1.01) | 0.76 (0.71, 0.80) |
|                                    | 2021 | -741 (-892, -590)    | 0.77 (0.73, 0.81) | 904 (358, 1450)         | 1.08 (1.03, 1.13) | 0.72 (0.67, 0.77) |
| Costa Rica                         | 2020 |                      |                   |                         |                   |                   |
|                                    | 2021 | -22.8 (-40.8, -4.81) | 0.68 (0.47, 0.89) | 9.25 (-46.7, 65.2)      | 1.03 (0.85, 1.20) | 0.66 (0.45, 0.92) |
| El Salvador                        | 2020 | -125 (-197, -53.6)   | 0.59 (0.41, 0.77) | -1650 (-2770, -520)     | 0.53 (0.30, 0.76) | 1.12 (0.64, 1.91) |
|                                    | 2021 | -54.7 (-138, 28.9)   | 0.82 (0.56, 1.07) | -2160 (-3670, -653)     | 0.44 (0.18, 0.70) | 1.86 (0.91, 3.74) |
| Guatemala                          | 2020 | -106 (-168, -44.5)   | 0.72 (0.58, 0.86) | -1140 (-1790, -483)     | 0.71 (0.57, 0.85) | 1.01 (0.78, 1.33) |
|                                    | 2021 | -75.9 (-152, -0.186) | 0.80 (0.63, 0.98) | -1160 (-2010, -299)     | 0.73 (0.55, 0.90) | 1.10 (0.80, 1.55) |
| Honduras                           | 2020 | -192 (-262, -121)    | 0.58 (0.47, 0.70) | -405 (-488, -323)       | 0.82 (0.79, 0.85) | 0.71 (0.59, 0.86) |
|                                    | 2021 | -130 (-215, -46.2)   | 0.71 (0.56, 0.87) | -217 (-315, -120)       | 0.90 (0.86, 0.94) | 0.79 (0.64, 1.01) |
| Mexico                             | 2020 | -1320 (-1400, -1240) | 0.63 (0.61, 0.65) | -4890 (-6000, -3780)    | 0.78 (0.73, 0.82) | 0.81 (0.76, 0.87) |
|                                    | 2021 | -629 (-727, -531)    | 0.83 (0.80, 0.85) | -1990 (-3370, -608)     | 0.91 (0.85, 0.97) | 0.90 (0.84, 0.97) |
| Nicaragua                          | 2020 | -102 (-167, -36.2)   | 0.66 (0.48, 0.84) | -636 (-1150, -120)      | 0.73 (0.54, 0.92) | 0.90 (0.62, 1.35) |
|                                    | 2021 | -123 (-211, -35.6)   | 0.62 (0.41, 0.83) | -872 (-1550, -197)      | 0.65 (0.43, 0.87) | 0.95 (0.57, 1.57) |
| Panama                             | 2020 | -75 (-119, -31.1)    | 0.60 (0.42, 0.78) | -413 (-777, -47.8)      | 0.71 (0.50, 0.93) | 0.84 (0.56, 1.29) |
|                                    | 2021 | -51.9 (-105, 1.23)   | 0.73 (0.49, 0.96) | -114 (-553, 324)        | 0.92 (0.63, 1.21) | 0.79 (0.48, 1.26) |
| Venezuela (Bolivarian Republic of) | 2020 | -277 (-384, -169)    | 0.76 (0.68, 0.84) | -1950 (-3340, -568)     | 0.83 (0.72, 0.94) | 0.91 (0.77, 1.10) |
|                                    | 2021 | -219 (-351, -87.9)   | 0.81 (0.71, 0.91) | -3670 (-5580, -1760)    | 0.72 (0.59, 0.84) | 1.13 (0.91, 1.38) |
| Tropical Latin America             | 2020 | -1320 (-1660, -982)  | 0.86 (0.82, 0.89) | -6570 (-15200, 2090)    | 0.92 (0.83, 1.02) | 0.93 (0.83, 1.04) |
|                                    | 2021 | -669 (-1090, -247)   | 0.93 (0.89, 0.97) | -6420 (-17200, 4400)    | 0.93 (0.81, 1.04) | 1.00 (0.88, 1.15) |
| Brazil                             | 2020 | -1230 (-1560, -893)  | 0.86 (0.83, 0.90) | -6250 (-14900, 2410)    | 0.93 (0.83, 1.02) | 0.93 (0.83, 1.05) |
|                                    | 2021 | -594 (-1010, -177)   | 0.93 (0.89, 0.98) | -6340 (-17100, 4470)    | 0.93 (0.81, 1.05) | 1.01 (0.88, 1.16) |
| Paraguay                           | 2020 | -92.5 (-145, -40.2)  | 0.74 (0.61, 0.87) | -320 (-604, -35.8)      | 0.88 (0.79, 0.98) | 0.84 (0.68, 1.03) |
|                                    | 2021 | -74.9 (-141, -9.11)  | 0.80 (0.64, 0.96) | -78.8 (-442, 284)       | 0.97 (0.85, 1.10) | 0.82 (0.66, 1.06) |
| North Africa and Middle East       | 2020 | -3900 (-4290, -3510) | 0.78 (0.76, 0.80) | -19500 (-23100, -15800) | 0.86 (0.83, 0.88) | 0.91 (0.88, 0.94) |
|                                    | 2021 | -2870 (-3360, -2380) | 0.84 (0.81, 0.86) | -16100 (-21200, -11100) | 0.88 (0.85, 0.92) | 0.95 (0.90, 1.00) |
| North Africa and Middle East       | 2020 | -3900 (-4290, -3510) | 0.78 (0.76, 0.80) | -19500 (-23100, -15800) | 0.86 (0.83, 0.88) | 0.91 (0.87, 0.94) |
|                                    | 2021 | -2870 (-3360, -2380) | 0.84 (0.81, 0.86) | -16100 (-21200, -11100) | 0.88 (0.85, 0.92) | 0.95 (0.91, 1.00) |
| Algeria                            | 2020 | -234 (-262, -206)    | 0.69 (0.66, 0.72) | -877 (-1130, -623)      | 0.80 (0.74, 0.85) | 0.87 (0.81, 0.94) |
|                                    | 2021 | -135 (-168, -102)    | 0.82 (0.78, 0.86) | -236 (-519, 46.7)       | 0.94 (0.87, 1.01) | 0.87 (0.80, 0.95) |
| Bahrain                            | 2020 | -0.184 (-3.25, 2.88) | 0.98 (0.65, 1.31) | 5.72 (-31.7, 43.2)      | 1.03 (0.83, 1.23) | 0.95 (0.63, 1.43) |
|                                    | 2021 | -1.4 (-5.14, 2.34)   | 0.83 (0.43, 1.24) | -14.6 (-69.7, 40.5)     | 0.93 (0.67, 1.19) | 0.90 (0.52, 1.63) |
| Egypt                              | 2020 | -295 (-500, -89.5)   | 0.62 (0.42, 0.83) | -1150 (-1660, -650)     | 0.85 (0.79, 0.91) | 0.73 (0.51, 1.03) |

|                            |      |                           |                   |                            |                   |                   |
|----------------------------|------|---------------------------|-------------------|----------------------------|-------------------|-------------------|
| Iran (Islamic Republic of) | 2021 | -327 (-592, -62.5)        | 0.61 (0.36, 0.85) | -1480 (-2090, -864)        | 0.81 (0.74, 0.88) | 0.75 (0.50, 1.14) |
|                            | 2020 | -895 (-1030, -765)        | 0.66 (0.62, 0.70) | -1440 (-1800, -1080)       | 0.75 (0.69, 0.80) | 0.88 (0.79, 0.97) |
|                            | 2021 | -692 (-845, -539)         | 0.73 (0.68, 0.78) | -719 (-1130, -309)         | 0.87 (0.80, 0.94) | 0.84 (0.76, 0.94) |
| Iraq                       | 2020 | -268 (-347, -188)         | 0.72 (0.65, 0.79) | -1170 (-1480, -866)        | 0.79 (0.74, 0.84) | 0.92 (0.81, 1.02) |
|                            | 2021 | -200 (-291, -110)         | 0.78 (0.69, 0.87) | -124 (-475, 226)           | 0.98 (0.91, 1.04) | 0.80 (0.70, 0.91) |
| Jordan                     | 2020 | -17.3 (-30.8, -3.76)      | 0.39 (0.09, 0.69) | -257 (-347, -168)          | 0.48 (0.35, 0.60) | 0.82 (0.36, 1.81) |
|                            | 2021 | -12.8 (-28.2, 2.54)       | 0.52 (0.11, 0.94) | -312 (-426, -198)          | 0.40 (0.26, 0.53) | 1.32 (0.58, 3.13) |
| Kuwait                     | 2020 | 0.888 (-4.29, 6.07)       | 1.03 (0.84, 1.22) | -200 (-347, -53.8)         | 0.77 (0.62, 0.92) | 1.34 (1.02, 1.76) |
|                            | 2021 | -3.24 (-9.74, 3.25)       | 0.89 (0.68, 1.10) | -169 (-349, 11.9)          | 0.81 (0.62, 0.99) | 1.10 (0.81, 1.51) |
| Lebanon                    | 2020 | 2.59 (-9.16, 14.3)        | 1.06 (0.76, 1.36) | 12 (-165, 189)             | 1.02 (0.75, 1.28) | 1.05 (0.71, 1.52) |
|                            | 2021 | 2.2 (-11.4, 15.8)         | 1.06 (0.70, 1.42) | -190 (-405, 24.1)          | 0.72 (0.45, 0.99) | 1.47 (0.92, 2.41) |
| Libya                      | 2020 | -27.4 (-61.4, 6.59)       | 0.82 (0.62, 1.02) | -342 (-986, 302)           | 0.83 (0.53, 1.12) | 0.99 (0.64, 1.58) |
|                            | 2021 | -40.3 (-84.6, 4)          | 0.75 (0.52, 0.99) | -369 (-1240, 504)          | 0.83 (0.47, 1.20) | 0.91 (0.51, 1.55) |
| Morocco                    | 2020 | -354 (-558, -150)         | 0.88 (0.82, 0.95) | -2880 (-4370, -1400)       | 0.90 (0.85, 0.95) | 0.98 (0.89, 1.07) |
|                            | 2021 | -251 (-507, 5.5)          | 0.92 (0.84, 1.00) | -3230 (-5050, -1410)       | 0.89 (0.83, 0.95) | 1.03 (0.93, 1.14) |
| Oman                       | 2020 | -6.58 (-21.8, 8.6)        | 0.84 (0.50, 1.18) | 10.7 (-73.5, 95)           | 1.04 (0.72, 1.36) | 0.81 (0.48, 1.38) |
|                            | 2021 | -5.53 (-24.3, 13.2)       | 0.87 (0.45, 1.29) | -65 (-164, 33.9)           | 0.75 (0.42, 1.08) | 1.15 (0.60, 2.30) |
| Qatar                      | 2020 | -9.02 (-12.3, -5.76)      | 0.53 (0.40, 0.65) | -305 (-376, -235)          | 0.74 (0.68, 0.79) | 0.71 (0.56, 0.91) |
|                            | 2021 | -2.93 (-9.09, 3.22)       | 0.89 (0.66, 1.11) | -469 (-588, -350)          | 0.67 (0.60, 0.74) | 1.32 (1.02, 1.72) |
| Saudi Arabia               | 2020 | -73.1 (-108, -38)         | 0.73 (0.62, 0.84) | -214 (-410, -18.7)         | 0.91 (0.84, 0.99) | 0.80 (0.68, 0.94) |
|                            | 2021 | -42.1 (-84.8, 0.573)      | 0.85 (0.71, 0.99) | -23.1 (-249, 202)          | 0.99 (0.90, 1.09) | 0.86 (0.70, 1.04) |
| Syrian Arab Republic       | 2020 | -46.2 (-106, 13.6)        | 0.79 (0.54, 1.03) | -0.148 (-542, 542)         | 1.00 (0.81, 1.19) | 0.79 (0.54, 1.13) |
|                            | 2021 | -25.8 (-98.1, 46.5)       | 0.88 (0.57, 1.19) | 622 (-60.7, 1300)          | 1.21 (0.96, 1.46) | 0.73 (0.48, 1.08) |
| Tunisia                    | 2020 | -71.1 (-98.6, -43.6)      | 0.84 (0.79, 0.90) | -250 (-1610, 1110)         | 0.91 (0.46, 1.36) | 0.92 (0.56, 1.55) |
|                            | 2021 | -109 (-143, -74.7)        | 0.77 (0.70, 0.83) | -696 (-2380, 993)          | 0.77 (0.27, 1.26) | 1.00 (0.52, 1.92) |
| Türkiye                    | 2020 | -705 (-833, -577)         | 0.70 (0.65, 0.74) | -952 (-1500, -402)         | 0.89 (0.84, 0.95) | 0.78 (0.71, 0.86) |
|                            | 2021 | -600 (-755, -444)         | 0.75 (0.69, 0.80) | -511 (-1150, 125)          | 0.94 (0.87, 1.01) | 0.79 (0.71, 0.88) |
| United Arab Emirates       | 2020 | -1.03 (-8.11, 6.05)       | 0.94 (0.56, 1.32) | -19.8 (-35.1, -4.43)       | 0.68 (0.48, 0.88) | 1.39 (0.85, 2.31) |
|                            | 2021 | -7.92 (-17.4, 1.54)       | 0.60 (0.23, 0.97) | -8.58 (-27.3, 10.2)        | 0.86 (0.58, 1.14) | 0.70 (0.35, 1.43) |
| Yemen                      | 2020 | -77.2 (-153, -1.48)       | 0.91 (0.83, 0.99) | -791 (-1500, -83.3)        | 0.91 (0.83, 0.99) | 1.00 (0.89, 1.14) |
|                            | 2021 | 7.46 (-84.7, 99.6)        | 1.01 (0.91, 1.11) | -303 (-1150, 544)          | 0.97 (0.87, 1.06) | 1.04 (0.89, 1.20) |
| South Asia                 | 2020 | -103000 (-124000, -80600) | 0.68 (0.63, 0.74) | -597000 (-940000, -254000) | 0.78 (0.67, 0.89) | 0.87 (0.74, 1.02) |
|                            | 2021 | -67100 (-96400, -37700)   | 0.81 (0.73, 0.88) | -320000 (-777000, 138000)  | 0.89 (0.74, 1.04) | 0.91 (0.75, 1.10) |
| South Asia                 | 2020 | -103000 (-124000, -80600) | 0.68 (0.63, 0.74) | -597000 (-940000, -254000) | 0.78 (0.67, 0.89) | 0.87 (0.74, 1.02) |
|                            | 2021 | -67100 (-96400, -37700)   | 0.81 (0.73, 0.88) | -320000 (-777000, 138000)  | 0.89 (0.74, 1.04) | 0.91 (0.75, 1.10) |
| Afghanistan                | 2020 | -824 (-932, -715)         | 0.83 (0.81, 0.85) | -8640 (-11300, -6000)      | 0.83 (0.78, 0.88) | 1.00 (0.94, 1.07) |
|                            | 2021 | -423 (-586, -260)         | 0.92 (0.89, 0.95) | -7840 (-11900, -3780)      | 0.85 (0.78, 0.92) | 1.07 (0.98, 1.17) |
| Bangladesh                 | 2020 | -16400 (-19400, -13300)   | 0.71 (0.66, 0.75) | -66400 (-73200, -59700)    | 0.74 (0.72, 0.76) | 0.95 (0.89, 1.03) |
|                            | 2021 | -9270 (-13500, -5040)     | 0.85 (0.79, 0.91) | -22800 (-31600, -14000)    | 0.92 (0.89, 0.95) | 0.93 (0.86, 1.00) |
| Bhutan                     | 2020 | -11.8 (-33.8, 10.2)       | 0.85 (0.59, 1.11) | 20 (-111, 151)             | 1.02 (0.86, 1.18) | 0.83 (0.56, 1.18) |
|                            | 2021 | 3.58 (-22.7, 29.9)        | 1.05 (0.70, 1.39) | -26.4 (-179, 126)          | 0.97 (0.78, 1.15) | 1.08 (0.75, 1.56) |

|                                  |      |                         |                   |                            |                   |                   |
|----------------------------------|------|-------------------------|-------------------|----------------------------|-------------------|-------------------|
| India                            | 2020 | -70900 (-92100, -49800) | 0.68 (0.60, 0.76) | -453000 (-794000, -112000) | 0.79 (0.65, 0.93) | 0.86 (0.70, 1.05) |
|                                  | 2021 | -48800 (-77100, -20500) | 0.79 (0.69, 0.90) | -276000 (-731000, 179000)  | 0.88 (0.69, 1.07) | 0.90 (0.71, 1.12) |
| Nepal                            | 2020 | -1610 (-2030, -1180)    | 0.74 (0.68, 0.80) | -3490 (-4170, -2810)       | 0.86 (0.84, 0.89) | 0.86 (0.79, 0.93) |
|                                  | 2021 | -1850 (-2450, -1250)    | 0.73 (0.65, 0.80) | -2200 (-3060, -1340)       | 0.91 (0.88, 0.95) | 0.80 (0.71, 0.89) |
| Pakistan                         | 2020 | -13600 (-18500, -8710)  | 0.68 (0.59, 0.78) | -73200 (-109000, -37400)   | 0.77 (0.67, 0.87) | 0.89 (0.73, 1.07) |
|                                  | 2021 | -7140 (-13500, -734)    | 0.84 (0.71, 0.97) | -18500 (-63200, 26200)     | 0.94 (0.81, 1.08) | 0.89 (0.73, 1.08) |
| Sub-Saharan Africa               | 2020 | -20400 (-26000, -14700) | 0.78 (0.72, 0.83) | -60800 (-125000, 3630)     | 0.95 (0.89, 1.00) | 0.82 (0.75, 0.90) |
|                                  | 2021 | -13000 (-21600, -4380)  | 0.87 (0.80, 0.95) | -59900 (-153000, 33000)    | 0.95 (0.88, 1.02) | 0.92 (0.80, 1.03) |
| Central Sub-Saharan Africa       | 2020 | -5850 (-10700, -991)    | 0.72 (0.52, 0.92) | -58200 (-116000, -182)     | 0.79 (0.60, 0.98) | 0.91 (0.64, 1.28) |
|                                  | 2021 | -9940 (-17600, -2230)   | 0.62 (0.39, 0.85) | -99600 (-185000, -13700)   | 0.70 (0.48, 0.92) | 0.89 (0.55, 1.42) |
| Central African Republic         | 2020 | -117 (-236, 1.58)       | 0.81 (0.63, 0.98) | -3170 (-5760, -578)        | 0.79 (0.64, 0.94) | 1.02 (0.77, 1.35) |
|                                  | 2021 | -190 (-381, 0.601)      | 0.75 (0.54, 0.97) | -6010 (-9910, -2110)       | 0.68 (0.50, 0.85) | 1.12 (0.75, 1.64) |
| Congo                            | 2020 | 23.6 (-82, 129)         | 1.03 (0.90, 1.16) | -1250 (-2520, 14.9)        | 0.89 (0.79, 1.00) | 1.15 (0.98, 1.36) |
|                                  | 2021 | 75.7 (-70.2, 222)       | 1.08 (0.91, 1.25) | -1260 (-2990, 470)         | 0.90 (0.76, 1.03) | 1.21 (0.97, 1.48) |
| Democratic Republic of the Congo | 2020 | -5570 (-10400, -719)    | 0.70 (0.48, 0.92) | -53300 (-111000, 4620)     | 0.78 (0.57, 0.99) | 0.90 (0.57, 1.38) |
|                                  | 2021 | -9660 (-17400, -1970)   | 0.60 (0.35, 0.85) | -92300 (-178000, -6590)    | 0.68 (0.44, 0.93) | 0.88 (0.50, 1.52) |
| Equatorial Guinea                | 2020 | -44 (-87.5, -0.447)     | 0.56 (0.23, 0.88) | -50.7 (-326, 224)          | 0.97 (0.81, 1.13) | 0.57 (0.32, 1.08) |
|                                  | 2021 | -34.2 (-98.9, 30.5)     | 0.71 (0.24, 1.17) | 215 (-151, 582)            | 1.12 (0.90, 1.34) | 0.63 (0.32, 1.29) |
| Gabon                            | 2020 | -144 (-417, 128)        | 0.55 (0.00, 1.18) | -408 (-876, 60.9)          | 0.92 (0.83, 1.01) | 0.60 (0.18, 1.93) |
|                                  | 2021 | -129 (-458, 199)        | 0.60 (0.00, 1.38) | -204 (-780, 372)           | 0.96 (0.85, 1.07) | 0.63 (0.16, 2.24) |
| Eastern Sub-Saharan Africa       | 2020 | -6520 (-8610, -4420)    | 0.82 (0.76, 0.87) | -24800 (-42300, -7250)     | 0.94 (0.90, 0.98) | 0.87 (0.80, 0.93) |
|                                  | 2021 | -7440 (-10400, -4480)   | 0.81 (0.74, 0.88) | -31700 (-56400, -7020)     | 0.93 (0.87, 0.98) | 0.87 (0.79, 0.97) |
| Burundi                          | 2020 | -84.3 (-165, -3.61)     | 0.87 (0.75, 0.99) | -116 (-852, 620)           | 0.98 (0.87, 1.09) | 0.88 (0.74, 1.04) |
|                                  | 2021 | 6.87 (-98.6, 112)       | 1.01 (0.86, 1.16) | -559 (-1440, 325)          | 0.92 (0.79, 1.04) | 1.10 (0.90, 1.36) |
| Ethiopia                         | 2020 | 154 (-309, 616)         | 1.03 (0.94, 1.12) | 4820 (-68.1, 9700)         | 1.05 (1.00, 1.10) | 0.98 (0.89, 1.09) |
|                                  | 2021 | -183 (-744, 378)        | 0.96 (0.85, 1.08) | 6750 (844, 12700)          | 1.07 (1.01, 1.14) | 0.90 (0.78, 1.03) |
| Kenya                            | 2020 | -1520 (-3000, -35.5)    | 0.76 (0.55, 0.96) | -13800 (-25900, -1700)     | 0.84 (0.72, 0.97) | 0.90 (0.66, 1.23) |
|                                  | 2021 | -1380 (-3290, 539)      | 0.79 (0.54, 1.05) | -12600 (-27600, 2400)      | 0.86 (0.71, 1.01) | 0.92 (0.63, 1.33) |
| Malawi                           | 2020 | -182 (-496, 131)        | 0.89 (0.70, 1.07) | -785 (-1800, 227)          | 0.95 (0.88, 1.01) | 0.94 (0.75, 1.18) |
|                                  | 2021 | -449 (-851, -48)        | 0.73 (0.53, 0.94) | -1210 (-2410, -3.67)       | 0.92 (0.84, 1.00) | 0.80 (0.60, 1.06) |
| Mauritius                        | 2020 | -5.92 (-9.77, -2.07)    | 0.46 (0.22, 0.70) | -7.37 (-14.8, 0.0946)      | 0.94 (0.87, 1.00) | 0.49 (0.29, 0.82) |
|                                  | 2021 | 4.4 (-0.0884, 8.89)     | 1.42 (0.91, 1.92) | -27.1 (-36, -18.1)         | 0.76 (0.69, 0.83) | 1.86 (1.29, 2.64) |
| Rwanda                           | 2020 | -61.8 (-113, -10.6)     | 0.87 (0.76, 0.97) | 292 (124, 459)             | 1.05 (1.02, 1.09) | 0.82 (0.73, 0.93) |
|                                  | 2021 | -140 (-203, -76.6)      | 0.70 (0.59, 0.82) | 75.6 (-127, 278)           | 1.01 (0.98, 1.05) | 0.70 (0.59, 0.82) |
| Somalia                          | 2020 | 72.2 (-26, 170)         | 1.06 (0.98, 1.14) | -1630 (-2840, -431)        | 0.91 (0.84, 0.97) | 1.17 (1.05, 1.30) |
|                                  | 2021 | 217 (97.5, 336)         | 1.18 (1.07, 1.29) | -2290 (-3880, -704)        | 0.87 (0.79, 0.96) | 1.35 (1.19, 1.53) |
| United Republic of Tanzania      | 2020 | 482 (-418, 1380)        | 1.04 (0.96, 1.13) | 5080 (884, 9270)           | 1.07 (1.01, 1.13) | 0.98 (0.89, 1.07) |
|                                  | 2021 | 307 (-948, 1560)        | 1.02 (0.92, 1.13) | 2140 (-3340, 7620)         | 1.03 (0.96, 1.10) | 1.00 (0.89, 1.12) |
| Uganda                           | 2020 |                         |                   | -13000 (-20500, -5530)     | 0.80 (0.69, 0.90) |                   |
|                                  | 2021 |                         |                   | -17900 (-28600, -7150)     | 0.75 (0.62, 0.88) |                   |
| Zambia                           | 2020 | 1330 (1030, 1630)       | 1.70 (1.49, 1.90) | 4170 (1860, 6470)          | 1.13 (1.05, 1.20) | 1.50 (1.32, 1.71) |



|                             |      |                       |                   |                      |                   |                   |
|-----------------------------|------|-----------------------|-------------------|----------------------|-------------------|-------------------|
|                             | 2021 | 3020 (2650, 3380)     | 2.57 (2.27, 2.87) | 13300 (10600, 16000) | 1.42 (1.32, 1.52) | 1.81 (1.56, 2.05) |
| Southern Sub-Saharan Africa | 2020 | -8760 (-10000, -7520) | 0.42 (0.37, 0.47) | 21100 (3690, 38500)  | 1.10 (1.01, 1.18) | 0.38 (0.33, 0.45) |
|                             | 2021 | -1900 (-3360, -446)   | 0.87 (0.78, 0.96) | 8070 (-11100, 27200) | 1.04 (0.94, 1.14) | 0.84 (0.72, 0.97) |
| Botswana                    | 2020 | -89.7 (-135, -43.9)   | 0.71 (0.59, 0.84) | -466 (-601, -332)    | 0.81 (0.76, 0.86) | 0.88 (0.74, 1.06) |
|                             | 2021 | -40.8 (-91.4, 9.81)   | 0.86 (0.70, 1.02) | 177 (37.7, 316)      | 1.08 (1.01, 1.15) | 0.79 (0.66, 0.95) |
| Lesotho                     | 2020 | -332 (-529, -134)     | 0.70 (0.55, 0.85) | -1530 (-2150, -922)  | 0.72 (0.63, 0.82) | 0.96 (0.75, 1.26) |
|                             | 2021 | -369 (-625, -114)     | 0.68 (0.50, 0.86) | -1350 (-2040, -651)  | 0.74 (0.63, 0.86) | 0.92 (0.67, 1.26) |
| Namibia                     | 2020 | -78.5 (-165, 8.02)    | 0.85 (0.69, 1.00) | -822 (-1430, -217)   | 0.89 (0.81, 0.97) | 0.95 (0.77, 1.16) |
|                             | 2021 | -25.1 (-125, 75)      | 0.95 (0.75, 1.15) | -519 (-1230, 189)    | 0.93 (0.83, 1.02) | 1.02 (0.80, 1.31) |
| South Africa                | 2020 | -7570 (-8750, -6380)  | 0.33 (0.27, 0.39) | 27800 (10500, 45200) | 1.16 (1.05, 1.26) | 0.28 (0.23, 0.35) |
|                             | 2021 | -1320 (-2710, 59.5)   | 0.88 (0.76, 1.00) | 12400 (-6700, 31500) | 1.08 (0.95, 1.20) | 0.82 (0.69, 0.96) |
| Eswatini                    | 2020 | -34.1 (-43.7, -24.6)  | 0.69 (0.62, 0.76) | 137 (-113, 387)      | 1.06 (0.94, 1.19) | 0.65 (0.55, 0.75) |
|                             | 2021 | 43.5 (34, 52.9)       | 1.48 (1.35, 1.60) | 149 (-106, 404)      | 1.08 (0.94, 1.23) | 1.36 (1.17, 1.61) |
| Zimbabwe                    | 2020 | -664 (-971, -357)     | 0.63 (0.49, 0.77) | -4070 (-5210, -2930) | 0.80 (0.74, 0.85) | 0.79 (0.64, 0.98) |
|                             | 2021 | -186 (-543, 170)      | 0.89 (0.70, 1.09) | -2780 (-4070, -1490) | 0.85 (0.79, 0.92) | 1.05 (0.84, 1.30) |
| Western Sub-Saharan Africa  | 2020 | 747 (-751, 2240)      | 1.04 (0.96, 1.11) | 1140 (-11900, 14200) | 1.00 (0.95, 1.06) | 1.03 (0.95, 1.12) |
|                             | 2021 | 6290 (4300, 8280)     | 1.28 (1.18, 1.38) | 63400 (46800, 79900) | 1.25 (1.17, 1.32) | 1.03 (0.93, 1.14) |
| Benin                       | 2020 | -48.9 (-123, 25)      | 0.84 (0.61, 1.06) | -484 (-995, 26.7)    | 0.88 (0.77, 1.00) | 0.95 (0.69, 1.25) |
|                             | 2021 | -94 (-191, 3.29)      | 0.71 (0.46, 0.96) | -841 (-1490, -196)   | 0.81 (0.67, 0.94) | 0.88 (0.60, 1.29) |
| Burkina Faso                | 2020 | -120 (-319, 79.6)     | 0.81 (0.52, 1.10) | -540 (-1880, 803)    | 0.91 (0.68, 1.13) | 0.89 (0.58, 1.40) |
|                             | 2021 | -44.8 (-310, 221)     | 0.93 (0.56, 1.31) | 91.5 (-1670, 1850)   | 1.01 (0.73, 1.30) | 0.92 (0.57, 1.49) |
| Cameroon                    | 2020 | -121 (-266, 24.1)     | 0.93 (0.84, 1.01) | -1010 (-2750, 726)   | 0.95 (0.87, 1.03) | 0.97 (0.86, 1.10) |
|                             | 2021 | -151 (-353, 51.6)     | 0.91 (0.80, 1.03) | -159 (-2420, 2110)   | 0.99 (0.89, 1.10) | 0.92 (0.78, 1.08) |
| Cabo Verde                  | 2020 | 9.5 (6.69, 12.3)      | 2.12 (1.64, 2.60) | -20.3 (-80.4, 39.8)  | 0.90 (0.63, 1.18) | 2.34 (1.65, 3.47) |
|                             | 2021 | 6.08 (2.96, 9.21)     | 1.77 (1.24, 2.29) | -41.4 (-114, 31.1)   | 0.80 (0.49, 1.11) | 2.20 (1.41, 3.55) |
| Chad                        | 2020 | 6.96 (-75.3, 89.2)    | 1.01 (0.91, 1.11) | -615 (-1910, 679)    | 0.95 (0.85, 1.05) | 1.06 (0.92, 1.21) |
|                             | 2021 | 10.9 (-90.3, 112)     | 1.01 (0.89, 1.13) | -159 (-1770, 1450)   | 0.99 (0.86, 1.11) | 1.03 (0.86, 1.22) |
| Côte d'Ivoire               | 2020 | -295 (-679, 88.3)     | 0.81 (0.58, 1.03) | -4150 (-9170, 878)   | 0.82 (0.62, 1.02) | 0.99 (0.69, 1.42) |
|                             | 2021 | -297 (-809, 215)      | 0.82 (0.55, 1.10) | -4480 (-10900, 1930) | 0.81 (0.57, 1.05) | 1.01 (0.63, 1.55) |
| Ghana                       | 2020 | -380 (-468, -292)     | 0.78 (0.74, 0.83) | -1130 (-1670, -579)  | 0.91 (0.87, 0.95) | 0.86 (0.80, 0.93) |
|                             | 2021 | -193 (-299, -87.8)    | 0.89 (0.83, 0.95) | -434 (-1080, 217)    | 0.96 (0.91, 1.02) | 0.92 (0.85, 1.00) |
| Guinea                      | 2020 | 66.4 (-368, 500)      | 1.07 (0.61, 1.53) | -1120 (-2040, -198)  | 0.93 (0.87, 0.99) | 1.15 (0.76, 1.74) |
|                             | 2021 | 239 (-318, 797)       | 1.23 (0.63, 1.84) | 808 (-380, 2000)     | 1.05 (0.98, 1.12) | 1.18 (0.73, 1.92) |
| Guinea-Bissau               | 2020 | -14.2 (-28.7, 0.358)  | 0.85 (0.71, 0.99) | 275 (44.7, 504)      | 1.13 (1.01, 1.24) | 0.76 (0.63, 0.92) |
|                             | 2021 | 43.3 (25.9, 60.7)     | 1.46 (1.23, 1.68) | 145 (-135, 425)      | 1.07 (0.93, 1.20) | 1.37 (1.12, 1.63) |
| Mali                        | 2020 | -159 (-440, 122)      | 0.83 (0.56, 1.10) | -1350 (-2990, 299)   | 0.82 (0.62, 1.02) | 1.01 (0.68, 1.48) |
|                             | 2021 | -230 (-618, 158)      | 0.78 (0.46, 1.11) | -1760 (-3960, 439)   | 0.79 (0.55, 1.02) | 1.00 (0.60, 1.66) |
| Mauritania                  | 2020 | -10.8 (-42.8, 21.2)   | 0.96 (0.85, 1.07) | -276 (-515, -37.2)   | 0.88 (0.79, 0.98) | 1.09 (0.93, 1.27) |
|                             | 2021 | 26.4 (-13, 65.8)      | 1.09 (0.95, 1.24) | -242 (-535, 50.7)    | 0.90 (0.78, 1.01) | 1.22 (1.01, 1.47) |
| Niger                       | 2020 | -143 (-283, -3.08)    | 0.90 (0.80, 0.99) | -1380 (-2850, 93.9)  | 0.88 (0.76, 1.00) | 1.02 (0.86, 1.22) |
|                             | 2021 | -293 (-487, -99.8)    | 0.81 (0.70, 0.93) | -832 (-2760, 1090)   | 0.93 (0.78, 1.08) | 0.87 (0.70, 1.08) |

|                       |      |                      |                   |                        |                   |                   |
|-----------------------|------|----------------------|-------------------|------------------------|-------------------|-------------------|
| Nigeria               | 2020 | 2440 (1230, 3650)    | 1.28 (1.12, 1.43) | 19900 (9240, 30600)    | 1.19 (1.08, 1.30) | 1.07 (0.92, 1.26) |
|                       | 2021 | 7970 (6430, 9520)    | 1.86 (1.63, 2.09) | 80000 (66800, 93300)   | 1.75 (1.58, 1.91) | 1.07 (0.92, 1.24) |
| Sao Tome and Principe | 2020 | -3.74 (-9.4, 1.92)   | 0.68 (0.28, 1.08) | -51.3 (-77.4, -25.1)   | 0.62 (0.47, 0.77) | 1.10 (0.58, 2.01) |
|                       | 2021 | -5.02 (-11.4, 1.32)  | 0.54 (0.12, 0.97) | -57.3 (-88.3, -26.4)   | 0.57 (0.39, 0.75) | 0.95 (0.43, 2.13) |
| Sierra Leone          | 2020 | -428 (-940, 83.1)    | 0.69 (0.38, 1.00) | -6810 (-10900, -2690)  | 0.68 (0.53, 0.84) | 1.01 (0.62, 1.66) |
|                       | 2021 | -667 (-1480, 143)    | 0.62 (0.25, 0.98) | -8700 (-14600, -2770)  | 0.65 (0.46, 0.84) | 0.95 (0.50, 1.76) |
| Togo                  | 2020 | -54.5 (-93.6, -15.4) | 0.75 (0.59, 0.90) | -134 (-281, 13.3)      | 0.94 (0.88, 1.00) | 0.79 (0.63, 1.00) |
|                       | 2021 | -34 (-83, 15)        | 0.85 (0.65, 1.05) | -23.1 (-198, 152)      | 0.99 (0.91, 1.07) | 0.86 (0.67, 1.10) |
| South Sudan           | 2020 | -588 (-1070, -110)   | 0.57 (0.31, 0.83) | -9770 (-17200, -2380)  | 0.60 (0.37, 0.84) | 0.94 (0.51, 1.71) |
|                       | 2021 | -1050 (-1970, -132)  | 0.48 (0.16, 0.79) | -19400 (-33300, -5610) | 0.46 (0.20, 0.72) | 1.05 (0.44, 2.48) |

**Table S3.** Bivariate linear regression results for observed to expected ratios of tuberculosis diagnoses during the COVID-19 pandemic in 2020

|                                          |                                                                  | <b>Coefficient (95% CI)</b> | <b>Standardized coefficient (95% CI)</b> | <b>Pearson <i>r</i> (95% CI)</b> |
|------------------------------------------|------------------------------------------------------------------|-----------------------------|------------------------------------------|----------------------------------|
| <b>Tuberculosis risk factors</b>         | Latent TB prevalence (per 1%)                                    | 1.002 (1.000, 1.005)        | 0.022 (-0.004, 0.048)                    | 0.130 (-0.022, 0.275)            |
|                                          | Indoor air pollution prevalence (per 5%)                         | 1.007 (1.003, 1.010)        | 0.046 (0.022, 0.071)                     | 0.275 (0.129, 0.409)             |
|                                          | Population density (per 5% population living over 1000 ppl/sqkm) | 0.997 (0.991, 1.003)        | -0.012 (-0.038, 0.013)                   | -0.073 (-0.222, 0.079)           |
|                                          | Age-standardized HIV prevalence rate (per 1,000)                 | 1.000 (1.000, 1.001)        | 0.015 (-0.010, 0.041)                    | 0.091 (-0.061, 0.238)            |
|                                          | Age-standardized smoking prevalence (per 5%)                     | 0.974 (0.959, 0.989)        | -0.043 (-0.068, -0.018)                  | -0.252 (-0.389, -0.106)          |
|                                          | Liters of alcohol consumed per capita                            | 0.993 (0.987, 0.999)        | -0.031 (-0.057, -0.006)                  | -0.183 (-0.325, -0.033)          |
|                                          | Age-standardized diabetes prevalence rate (per 1,000)            | 1.000 (0.999, 1.001)        | -0.009 (-0.035, 0.017)                   | -0.055 (-0.204, 0.097)           |
| <b>Health system factors</b>             | Healthcare access and quality index (per 5 score)                | 0.991 (0.985, 0.996)        | -0.043 (-0.068, -0.017)                  | -0.251 (-0.387, -0.104)          |
|                                          | Health worker density (health workers per 1,000)                 | 0.999 (0.997, 1.001)        | -0.015 (-0.041, 0.010)                   | -0.091 (-0.239, 0.060)           |
|                                          | Hospital Beds (per 1000)                                         | 0.989 (0.979, 1.000)        | -0.026 (-0.051, -0.000)                  | -0.151 (-0.296, -0.000)          |
|                                          | Pandemic preparedness (per 5 score in GHS Index)                 | 0.988 (0.979, 0.997)        | -0.034 (-0.059, -0.008)                  | -0.198 (-0.338, -0.048)          |
| <b>Socio-demographic factors</b>         | Lag distributed income per capita (per 25%)                      | 0.995 (0.990, 0.999)        | -0.029 (-0.054, -0.003)                  | -0.168 (-0.311, -0.018)          |
|                                          | Percent of population 65 and above (per 5%)                      | 0.965 (0.947, 0.984)        | -0.046 (-0.071, -0.021)                  | -0.268 (-0.403, -0.122)          |
|                                          | Education (2 years per capita)                                   | 0.968 (0.951, 0.985)        | -0.047 (-0.072, -0.022)                  | -0.278 (-0.412, -0.133)          |
|                                          | Socio-demographic index (per 5 score)                            | 0.988 (0.981, 0.995)        | -0.042 (-0.067, -0.017)                  | -0.248 (-0.384, -0.100)          |
| <b>Public health and social measures</b> | Stringency index (per 5 score)                                   | 0.988 (0.981, 0.996)        | -0.040 (-0.066, -0.015)                  | -0.245 (-0.386, -0.093)          |
|                                          | Stay-at-home order (per 30 days in place)                        | 0.987 (0.980, 0.995)        | -0.042 (-0.067, -0.017)                  | -0.254 (-0.394, -0.102)          |
|                                          | School closure (per 30 days in place)                            | 0.981 (0.972, 0.990)        | -0.051 (-0.076, -0.026)                  | -0.308 (-0.443, -0.161)          |
|                                          | Workplace closures (per 30 days in place)                        | 0.989 (0.981, 0.997)        | -0.034 (-0.059, -0.008)                  | -0.204 (-0.349, -0.050)          |
|                                          | Internal movement restrictions (per 30 days in place)            | 0.994 (0.986, 1.002)        | -0.019 (-0.045, 0.007)                   | -0.114 (-0.265, 0.042)           |
|                                          | Mask use prevalence (per 5%)                                     | 0.992 (0.985, 1.000)        | -0.026 (-0.051, -0.000)                  | -0.154 (-0.298, -0.003)          |
|                                          | Mobility (per 5%)                                                | 1.021 (1.008, 1.035)        | 0.040 (0.015, 0.066)                     | 0.239 (0.092, 0.377)             |
| <b>COVID-19 factors</b>                  | Reported COVID-19 case rate (per 1,000)                          | 0.997 (0.996, 0.998)        | -0.054 (-0.078, -0.029)                  | -0.318 (-0.448, -0.175)          |
|                                          | SARS-CoV-2 infection rate (per 25%)                              | 0.994 (0.990, 0.999)        | -0.034 (-0.059, -0.009)                  | -0.202 (-0.342, -0.052)          |

|                                                           |                      |                         |                         |
|-----------------------------------------------------------|----------------------|-------------------------|-------------------------|
| Age-standardized reported COVID-19 death rate (per 1,000) | 0.938 (0.904, 0.973) | -0.043 (-0.068, -0.018) | -0.255 (-0.391, -0.108) |
| Age-standardized total COVID-19 death rate (per 1,000)    | 1.007 (0.993, 1.022) | 0.013 (-0.013, 0.039)   | 0.077 (-0.075, 0.225)   |
| Age-standardized excess death rate (per 1,000)            | 1.006 (0.995, 1.018) | 0.014 (-0.011, 0.040)   | 0.086 (-0.066, 0.234)   |

**Table S4.** Bivariate linear regression results for observed to expected ratios of tuberculosis diagnoses during the COVID-19 pandemic in 2021

|                                          |                                                                  | Coefficient (95% CI) | Standardized coefficient (95% CI) | Pearson $r$ (95% CI)    |
|------------------------------------------|------------------------------------------------------------------|----------------------|-----------------------------------|-------------------------|
| <b>Tuberculosis risk factors</b>         | Latent TB prevalence (per 1%)                                    | 1.000 (0.997, 1.003) | -0.001 (-0.032, 0.029)            | -0.006 (-0.157, 0.144)  |
|                                          | Indoor air pollution prevalence (per 5%)                         | 1.006 (1.002, 1.010) | 0.043 (0.013, 0.073)              | 0.214 (0.065, 0.353)    |
|                                          | Population density (per 5% population living over 1000 ppl/sqkm) | 0.999 (0.991, 1.006) | -0.005 (-0.036, 0.025)            | -0.027 (-0.177, 0.124)  |
|                                          | Age-standardized HIV prevalence rate (per 1,000)                 | 1.001 (1.000, 1.002) | 0.026 (-0.004, 0.056)             | 0.130 (-0.021, 0.275)   |
|                                          | Age-standardized smoking prevalence (per 5%)                     | 0.957 (0.940, 0.974) | -0.071 (-0.100, -0.043)           | -0.355 (-0.480, -0.216) |
|                                          | Liters of alcohol consumed per capita                            | 0.996 (0.989, 1.003) | -0.019 (-0.050, 0.011)            | -0.096 (-0.243, 0.055)  |
|                                          | Age-standardized diabetes prevalence rate (per 1,000)            | 0.999 (0.998, 1.000) | -0.035 (-0.065, -0.005)           | -0.174 (-0.316, -0.024) |
| <b>Health system factors</b>             | Healthcare access and quality index (per 5 score)                | 0.991 (0.985, 0.998) | -0.040 (-0.070, -0.010)           | -0.197 (-0.337, -0.048) |
|                                          | Health worker density (health workers per 1,000)                 | 1.000 (0.997, 1.002) | -0.005 (-0.036, 0.026)            | -0.025 (-0.175, 0.126)  |
|                                          | Hospital Beds (per 1000)                                         | 0.987 (0.974, 0.999) | -0.032 (-0.062, -0.002)           | -0.158 (-0.301, -0.008) |
|                                          | Pandemic preparedness (per 5 score in GHS Index)                 | 0.990 (0.979, 1.001) | -0.028 (-0.058, 0.002)            | -0.138 (-0.283, 0.012)  |
| <b>Socio-demographic factors</b>         | Lag distributed income per capita (per 25%)                      | 0.995 (0.990, 1.000) | -0.028 (-0.058, 0.002)            | -0.140 (-0.285, 0.011)  |
|                                          | Percent of population 65 and above (per 5%)                      | 0.966 (0.944, 0.988) | -0.045 (-0.075, -0.016)           | -0.226 (-0.364, -0.078) |
|                                          | Education (2 years per capita)                                   | 0.973 (0.953, 0.994) | -0.039 (-0.069, -0.009)           | -0.194 (-0.335, -0.045) |
|                                          | Socio-demographic index (per 5 score)                            | 0.988 (0.980, 0.996) | -0.043 (-0.073, -0.013)           | -0.216 (-0.355, -0.067) |
| <b>Public health and social measures</b> | Stringency index (per 5 score)                                   | 0.985 (0.976, 0.994) | -0.048 (-0.077, -0.018)           | -0.249 (-0.390, -0.098) |
|                                          | Stay-at-home order (per 30 days in place)                        | 0.996 (0.992, 1.000) | -0.028 (-0.058, 0.002)            | -0.147 (-0.295, 0.008)  |
|                                          | School closure (per 30 days in place)                            | 0.991 (0.986, 0.996) | -0.049 (-0.078, -0.020)           | -0.259 (-0.398, -0.108) |
|                                          | Workplace closures (per 30 days in place)                        | 0.994 (0.989, 0.999) | -0.037 (-0.066, -0.008)           | -0.195 (-0.340, -0.041) |
|                                          | Internal movement restrictions (per 30 days in place)            | 0.998 (0.994, 1.003) | -0.011 (-0.041, 0.018)            | -0.060 (-0.213, 0.096)  |
|                                          | Mask use prevalence (per 5%)                                     | 0.995 (0.987, 1.003) | -0.019 (-0.050, 0.011)            | -0.096 (-0.243, 0.055)  |
|                                          | Mobility (per 5%)                                                | 1.013 (1.003, 1.022) | 0.041 (0.011, 0.071)              | 0.203 (0.054, 0.343)    |
| <b>COVID-19 factors</b>                  | Reported COVID-19 case rate (per 1,000)                          | 0.999 (0.999, 1.000) | -0.041 (-0.071, -0.011)           | -0.205 (-0.346, -0.056) |
|                                          | SARS-CoV-2 infection rate (per 25%)                              | 1.003 (0.995, 1.010) | 0.011 (-0.020, 0.041)             | 0.054 (-0.097, 0.203)   |

|                                                           |                      |                         |                         |
|-----------------------------------------------------------|----------------------|-------------------------|-------------------------|
| Age-standardized reported COVID-19 death rate (per 1,000) | 0.967 (0.943, 0.993) | -0.039 (-0.069, -0.009) | -0.193 (-0.334, -0.044) |
| Age-standardized total COVID-19 death rate (per 1,000)    | 1.011 (1.000, 1.021) | 0.030 (-0.001, 0.060)   | 0.148 (-0.003, 0.292)   |
| Age-standardized excess death rate (per 1,000)            | 1.008 (1.001, 1.016) | 0.033 (0.002, 0.063)    | 0.162 (0.012, 0.305)    |
